# Supplementary material
Source: Royal Society of Chemistry journal article supplement (doi:10.1039/d6nj00835f)
Supplement: d6nj00835f1.pdf [file d6nj00835f1.pdf]

## Supporting Information

# D- $\pi$ -A Type AIE Molecules Exhibiting Persistent Room Temperature Phosphorescence and Delayed Fluorescence through Structural Regulation

Zhijia Zhang,<sup>a</sup> Hongmei Qu,<sup>a,\*</sup> Xia Li,<sup>a,\*</sup> Yameng Li,<sup>a</sup> Ruihan Dai,<sup>a</sup> Xuesong Zhang,<sup>a</sup> and Wenjing Pan<sup>a</sup>

<sup>a</sup>Key Laboratory of Systems Bioengineering, Ministry of Education, School of Synthetic Biology and Biomanufacturing, Tianjin University, Tianjin 300350, China

\* E-mail: [ququhongmei@126.com](mailto:ququhongmei@126.com) (H. Qu), [lixia01@tju.edu.cn](mailto:lixia01@tju.edu.cn) (X. Li)

### Table of Contents

|                                                                    |    |
|--------------------------------------------------------------------|----|
| 1. Synthesis routes of Carbazole and CzBI-Br .....                 | 2  |
| 2. Photophysical properties .....                                  | 4  |
| 3. Theoretic calculations .....                                    | 12 |
| 4. X-Ray crystallographic data .....                               | 17 |
| 5. <sup>1</sup> H NMR, <sup>13</sup> C NMR and HRMS spectrum ..... | 31 |
| Reference .....                                                    | 42 |

## 1. Synthesis routes of Carbazole and CzBI-Br

**Scheme 1.** The synthesis routes of CzBI-OBN, CzBI-OBIN and CzBI-ONAN.

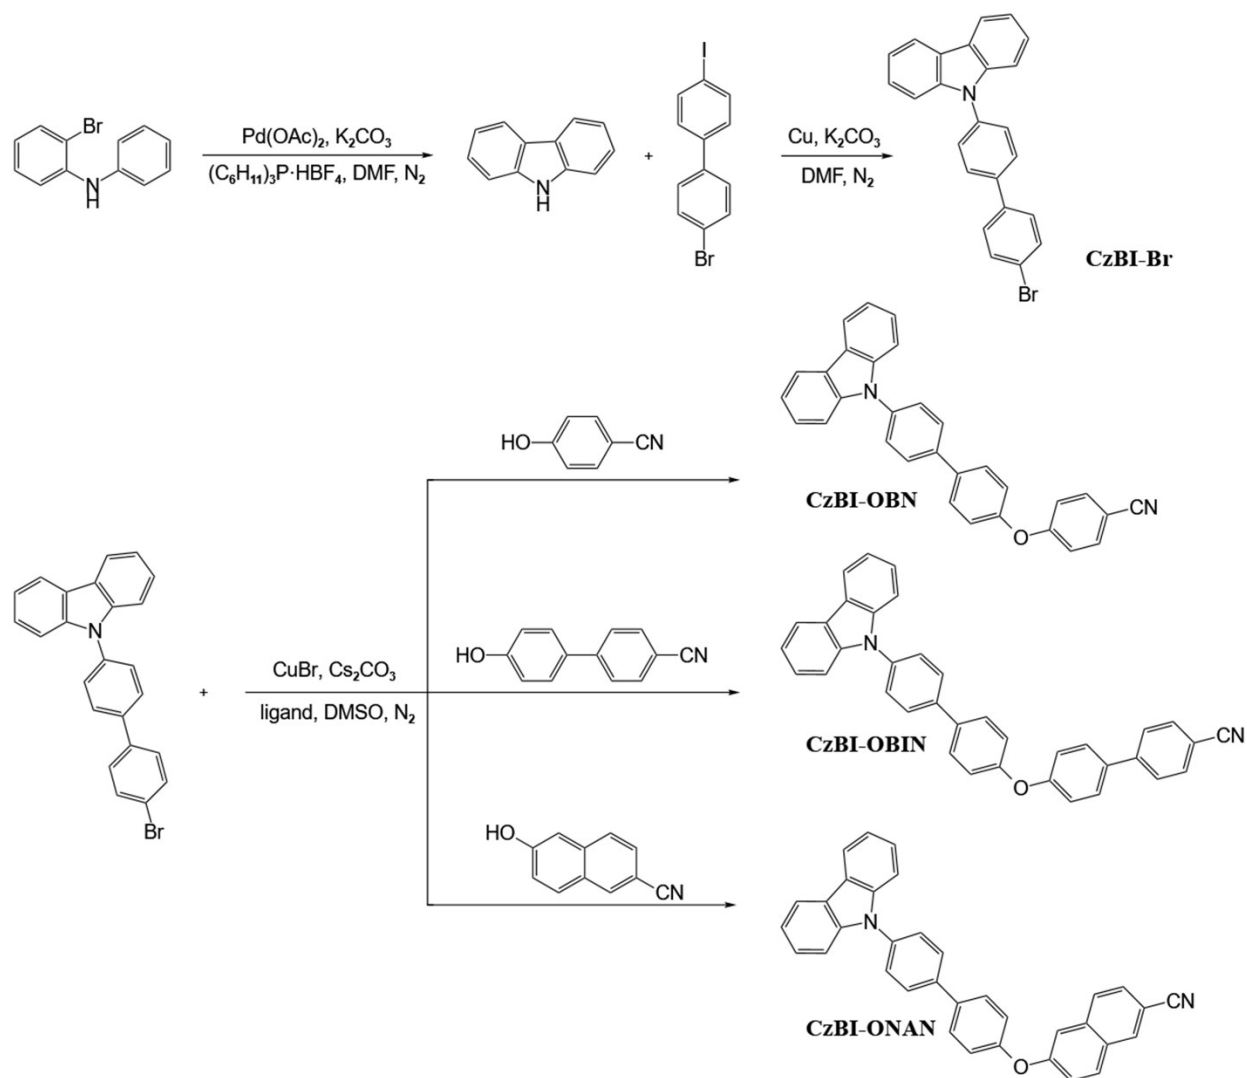

### 1.1 Synthesis of Carbazole

Carbazole was prepared according to the previous work.<sup>1</sup> 2-Bromo-N-phenylaniline (2.53 g, 10 mmol),  $\text{Pd}(\text{OAc})_2$  (0.23 g, 1 mmol),  $(\text{C}_6\text{H}_{11})_3\text{P}\cdot\text{HBF}_4$  (0.75 g, 2 mmol),  $\text{K}_2\text{CO}_3$  (2.8 g, 20 mmol) and DMF (50 mL) were added to a 200 mL Schleck flask. The flask was evacuated and purged with nitrogen twice, and then heated to 130 °C for 14 h. After the reaction, the mixture was

poured into water when it cooled to room temperature and extracted with dichloromethane (3×50 mL). The organic phase was dried with anhydrous magnesium sulfate and filtered to remove the solid. The resulting organic phase was rotary-evaporated to obtain the crude carbazole. The crude product was purified by silica gel column chromatography using ethyl acetate and petroleum ether (v/v, 1:20) as eluents, to afford a pale yellow powder. After recrystallization from toluene, a white powder was obtained. Yield: 83.7% (1.40 g). <sup>1</sup>H NMR (500 MHz, DMSO-d<sub>6</sub>) δ 11.24 (s, 1H), 8.11 (d, J = 7.8 Hz, 2H), 7.49 (d, J = 8.1 Hz, 2H), 7.42-7.35 (m, 2H), 7.18-7.12 (m, 2H).

## 1.2 Synthesis of 9-(4'-bromo-[1,1'-biphenyl]-4-yl)-9H-carbazole (CzBI-Br)

Carbazole (1.17 g, 7.0 mmol), 4-bromo-4'-iodobiphenyl (3.81 g, 10.5 mmol), K<sub>2</sub>CO<sub>3</sub> (3.91 g, 28.0 mmol), copper powder (0.9 g, 14 mmol), and DMF (20 mL) were added to a 50 mL Schleck flask. The flask was evacuated and purged with nitrogen twice, and then heated to 130 °C for 30 h. The reaction process was monitored by TLC. After the reaction, the mixture was cooled to room temperature, filtered, and then diluted with ethyl acetate (100 mL). The solution was poured into a separatory funnel and extracted with water (3×80 mL). The organic phase was dried with anhydrous magnesium sulfate and filtered to remove the solid. The organic solvent was removed by rotary evaporation to get the crude product. The crude product was purified by silica gel column chromatography using petroleum ether and dichloromethane (v/v, 20:1) as eluents, to obtain a white powder. Yield: 65% (1.81g). <sup>1</sup>H NMR (400 MHz, DMSO-d<sub>6</sub>) δ 8.27 (dd, J = 7.8, 1.2 Hz, 2H), 8.01-7.97 (m, 2H), 7.80-7.71 (m, 6H), 7.48-7.44 (m, 4H), 7.32 (dt, J = 8.0, 4.1 Hz, 2H).

## 2. Photophysical properties

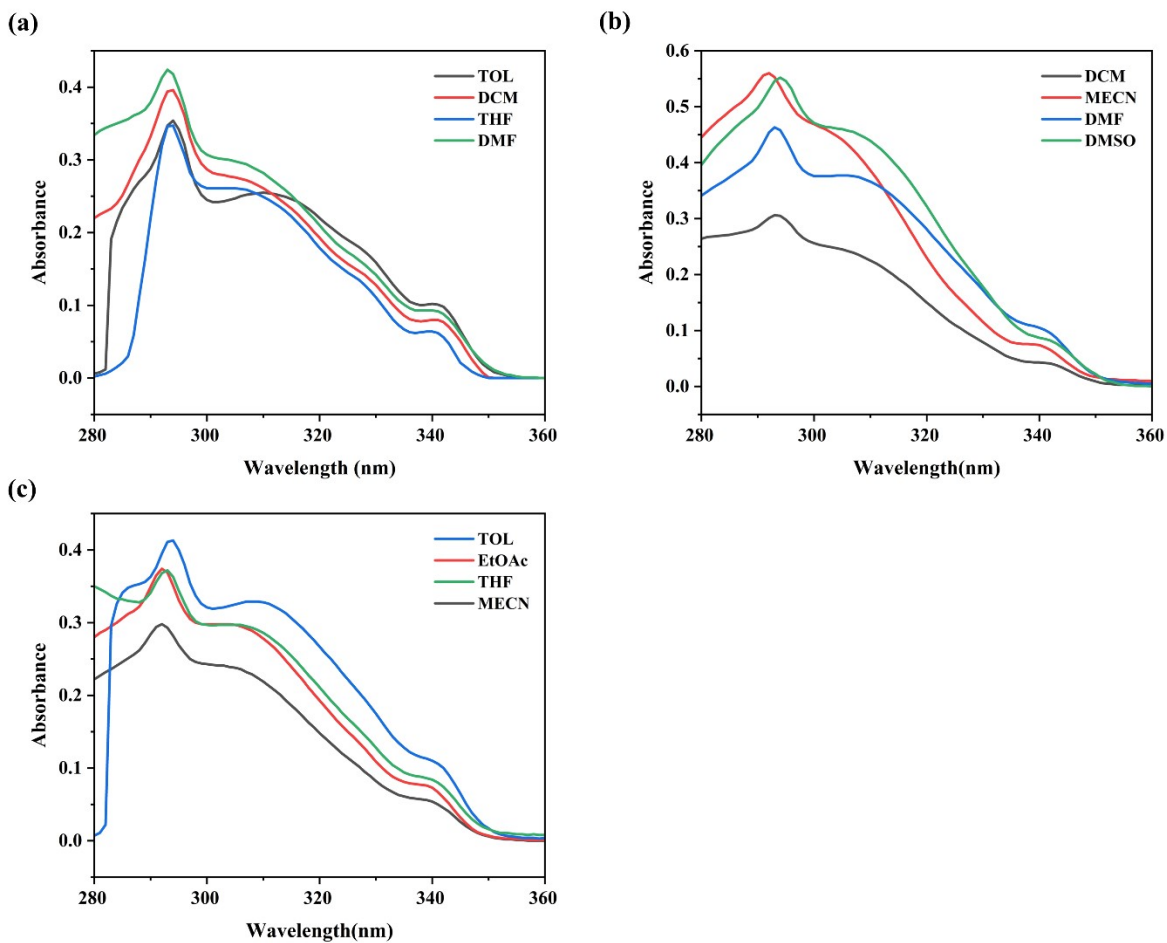

**Fig. S1.** The absorption spectra of CzBI-OBN (a), CzBI-OBIN (b) and CzBI-ONAN (c) in different solvents. Concentration:  $1 \times 10^{-5}$  M.

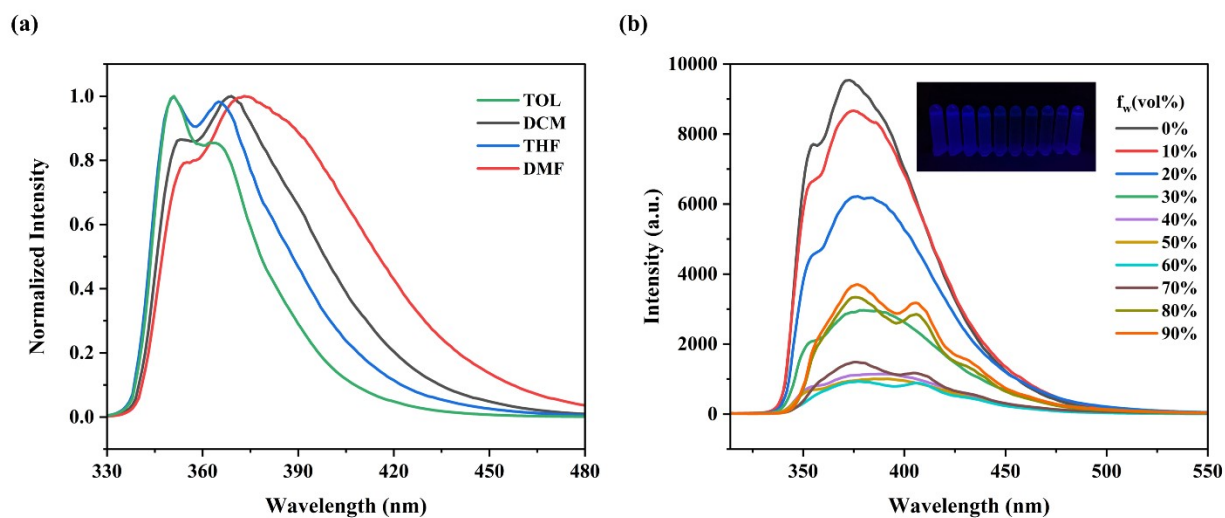

**Fig. S2.** (a) Normalized emission spectra of **CzBI-OBN** in different solvent ( $\lambda_{\text{ex}} = 307 \text{ nm}$ ); (b) Fluorescence spectra of **CzBI-OBN** in DMF/H<sub>2</sub>O mixtures with different water fractions ( $f_w$ ,  $\lambda_{\text{ex}} = 280 \text{ nm}$ ), (Insets in figure: Emission photos of **CzBI-OBN** in DMF/H<sub>2</sub>O mixtures with the increase of  $f_w$  under 365 nm UV light). Concentration:  $1 \times 10^{-5} \text{ M}$ .

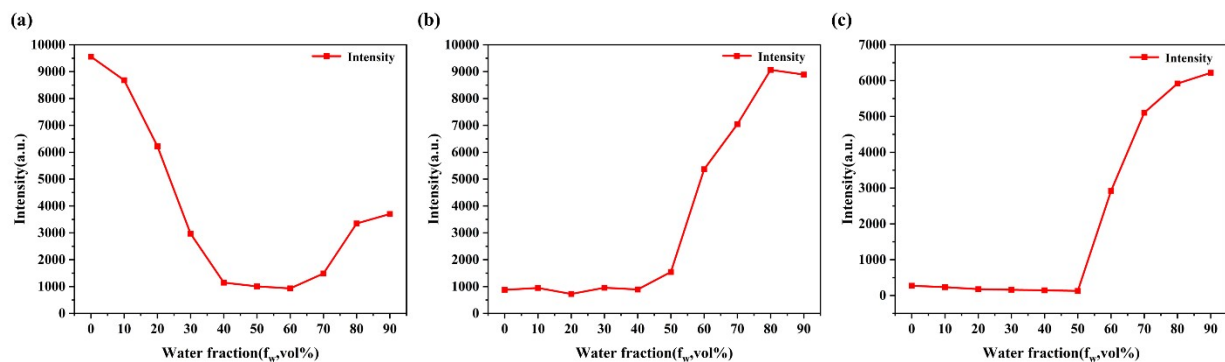

**Fig. S3.** Effect of water fraction on maximum fluorescence intensity and wavelength of dispersions of **CzBI-OBN** (a), **CzBI-OBIN** (b) and **CzBI-ONAN** (c).

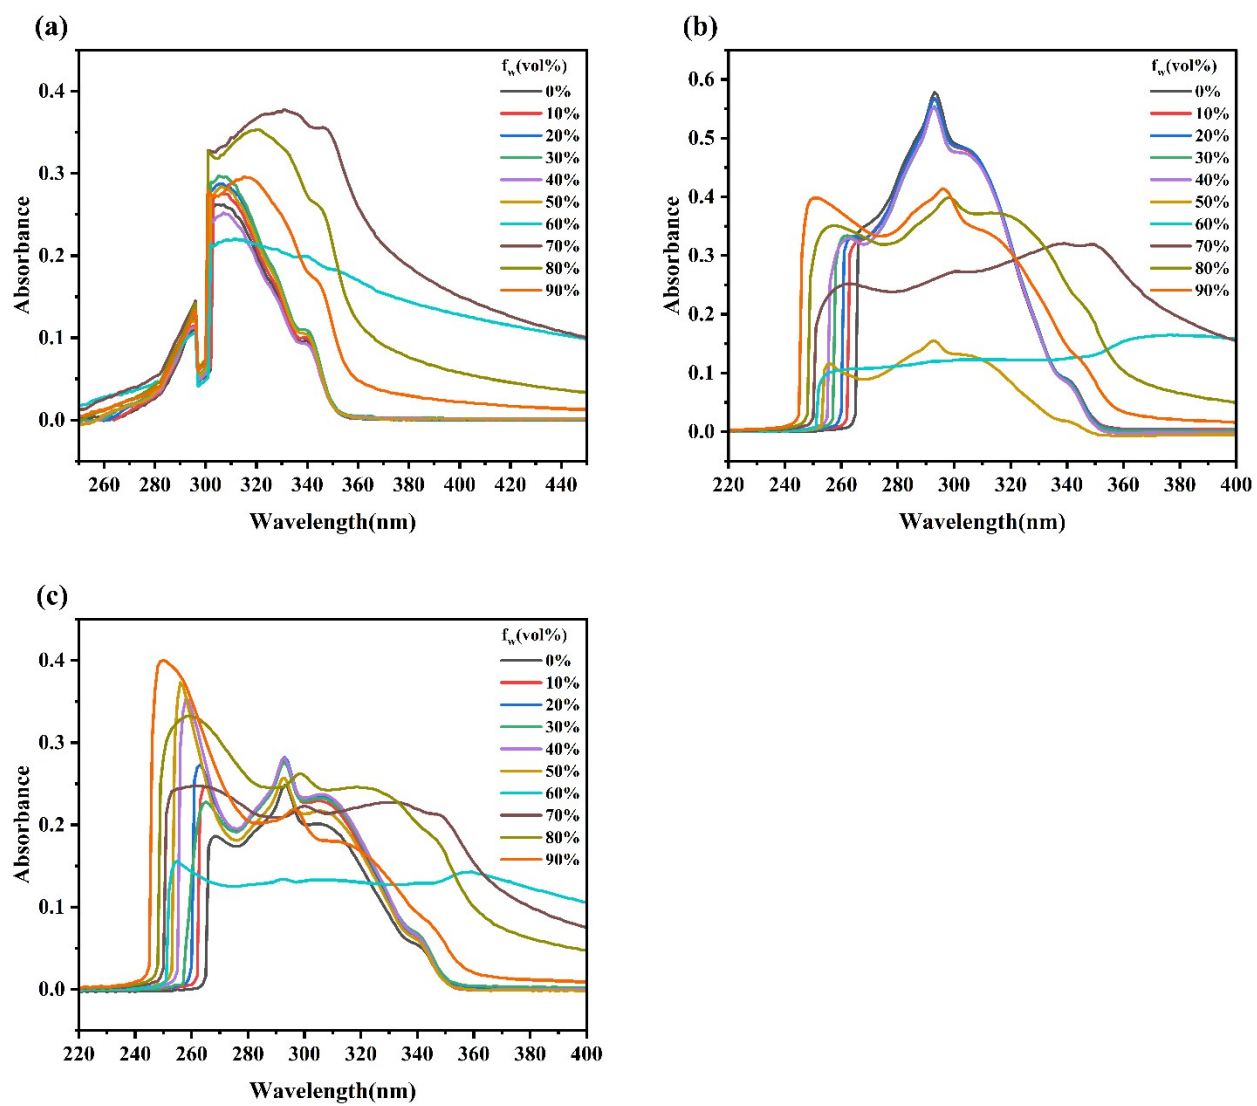

**Fig. S4.** Absorption spectra of CzBI-OBN (a), CzBI-OBIN (b) and CzBI-ONAN (c) in DMF/H<sub>2</sub>O mixtures with different water fractions at a concentration of  $10^{-5}$  M.

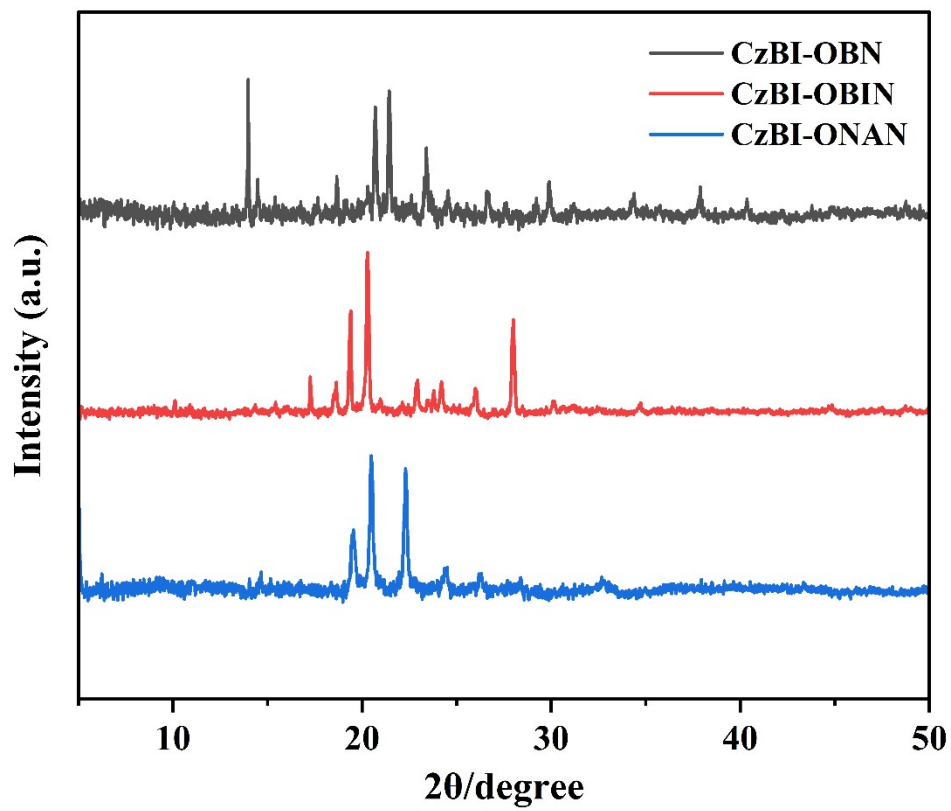

**Fig. S5.** Powder X-ray diffraction (PXRD) patterns of original powders of **CzBI-OBN**, **CzBI-OBIN** and **CzBI-ONAN**.

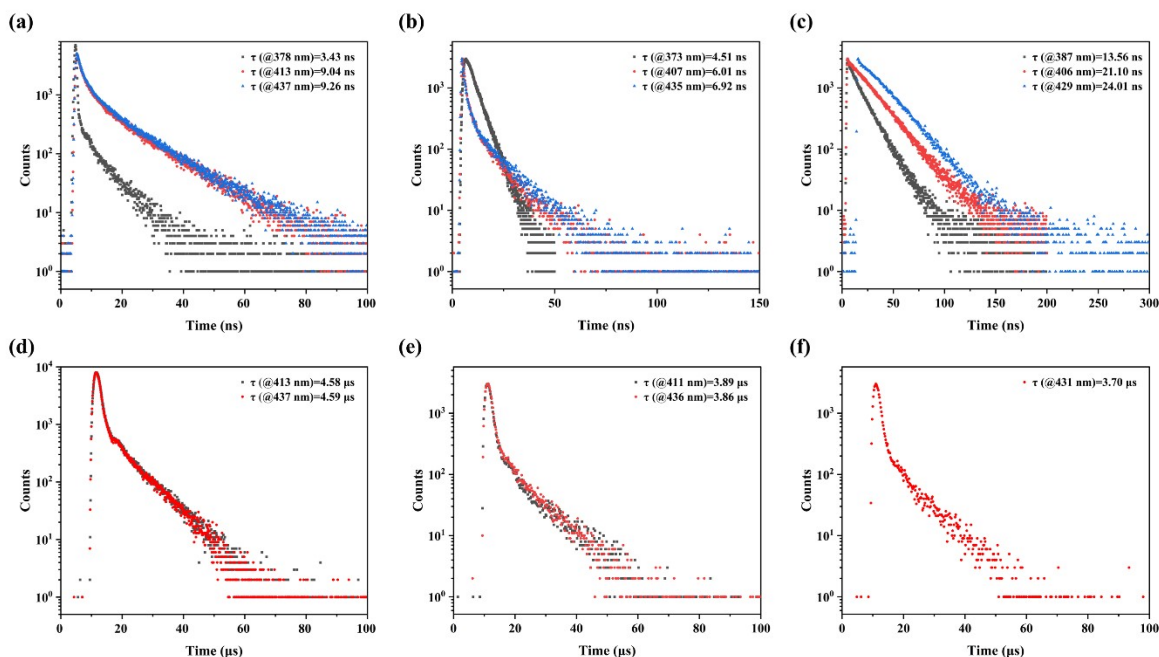

**Fig. S6.** Time-resolved decay curves of **CzBI-OBN** at 378, 413 and 437 nm (a), **CzBI-OBIN** at 373, 407 and 435 nm (b), **CzBI-ONAN** at 387, 406 and 429 nm (c); Time-resolved decay curves of delayed fluorescence of **CzBI-OBN** at 413 and 437 nm (d), **CzBI-OBIN** at 411 and 436 nm (e), **CzBI-ONAN** at 431 nm (f).

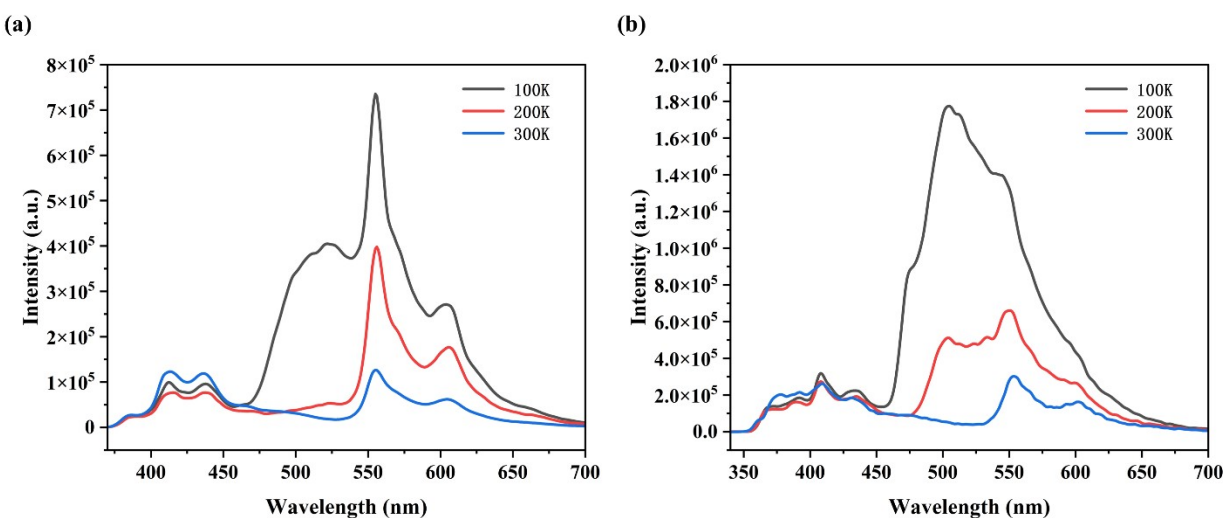

**Fig. S7.** Temperature-dependent phosphorescence spectra of **CzBI-OBN** (a) and **CzBI-OBIN** (b) in the solid state.

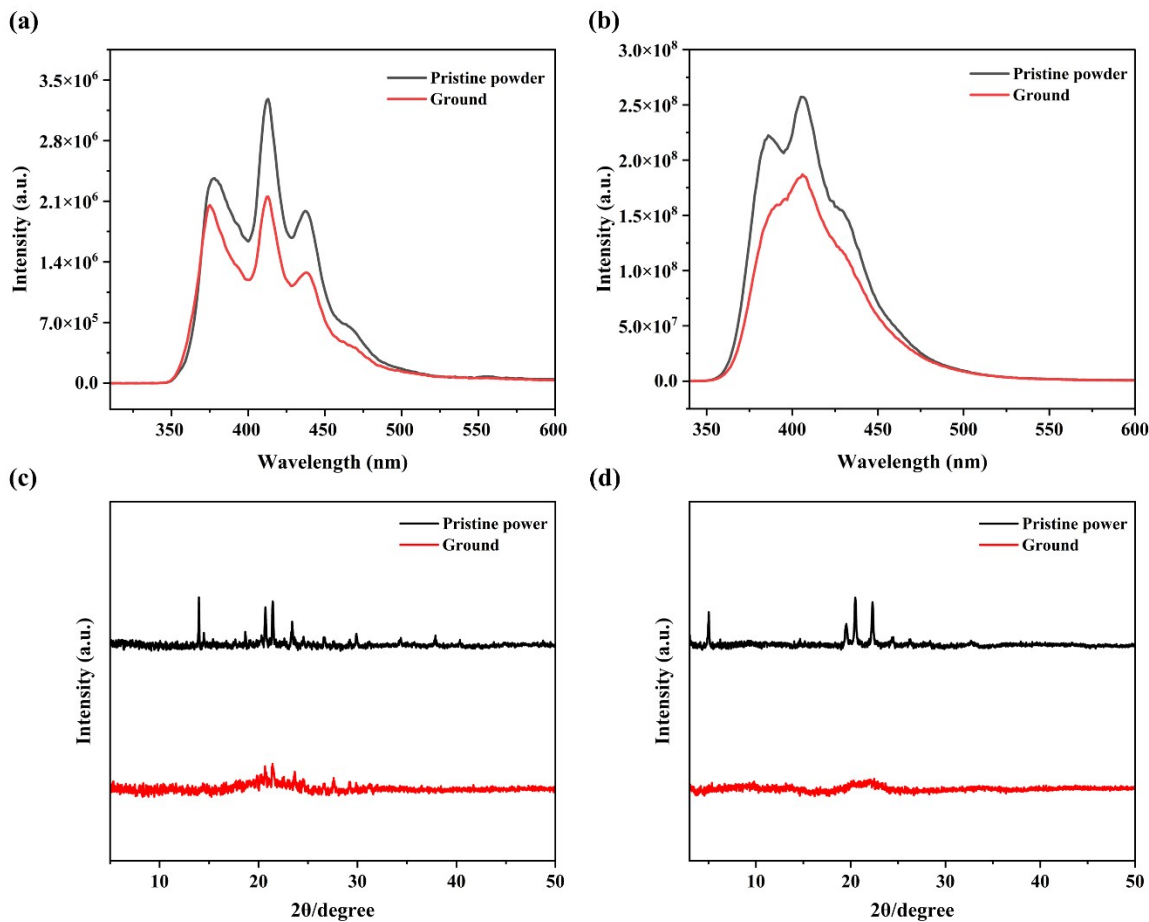

**Fig. S8.** Steady-state PL spectra of **CzBI-OBN** (a) and **CzBI-ONAN** (b): pristine powder and ground sample; PXR patterns of **CzBI-OBN** (c) and **CzBI-ONAN** (d): pristine powder and ground sample.

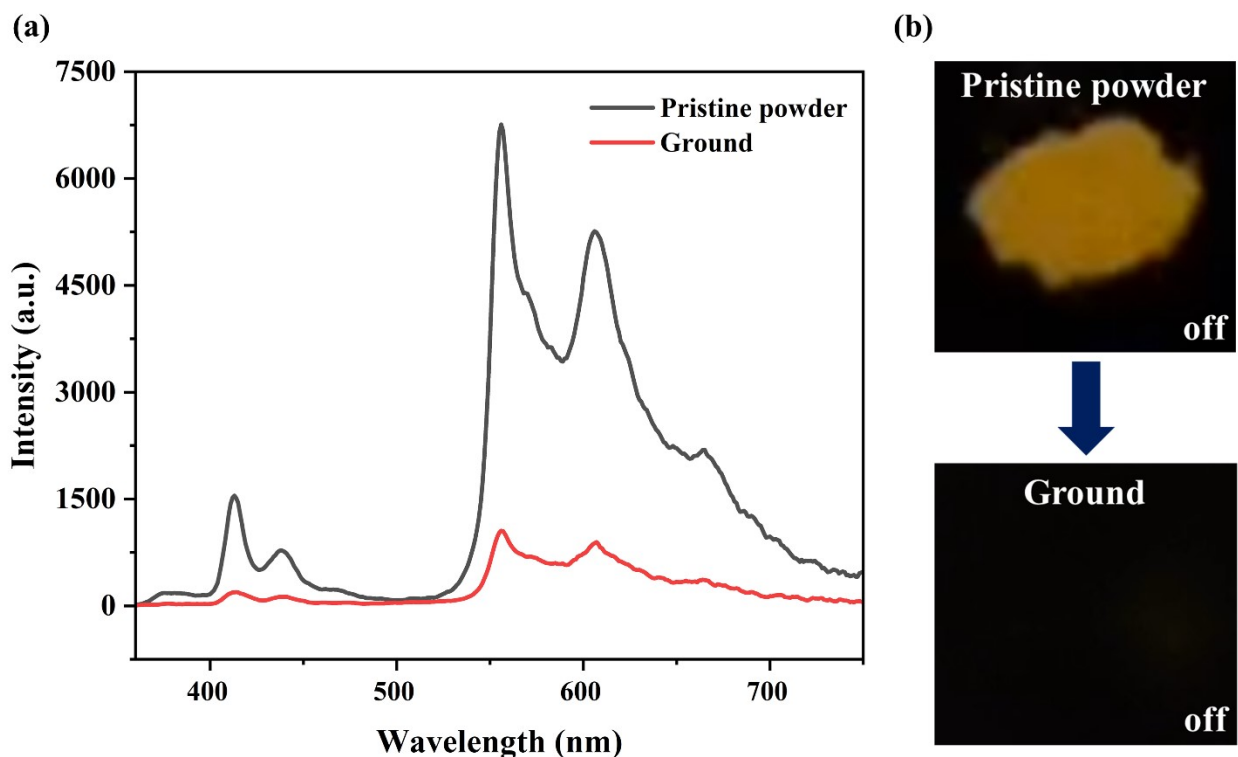

**Fig. S9.** (a) Phosphorescence spectra of the pristine and ground samples of **CzBI-OBN** ( $\lambda_{\text{ex}} = 300$  nm); (b) the afterglow image of samples with UV light turned off.

**Table S1.** Comparison of photophysical properties of organic materials exhibiting dual-mode DF and RTP emission.

| Compound         | Emission mode | $\tau_{\text{DF}}$ ( $\mu\text{s}/\text{nm}$ ) | $\tau_{\text{P}}$ (ms/nm) | $\Phi_{\text{P}}$ (%) | Reference |
|------------------|---------------|------------------------------------------------|---------------------------|-----------------------|-----------|
| <b>CzBI-OBN</b>  | Dual          | 4.58/413                                       | 397.69/556                | 0.55                  | -         |
|                  |               | 4.59/437                                       | 476.34/606                |                       |           |
| <b>CzBI-OBIN</b> | Dual          | 3.89/411                                       | 522.78/554                | 0.73                  | -         |
|                  |               | 3.86/436                                       | 547.31/602                |                       |           |
| <b>CzBI-ONAN</b> | Dual          | 3.70/431                                       | 13.01/620                 | 0.78                  | -         |
| 2Cbz             | Dual          | 49.8/410                                       | 60.6/580                  | 0.6                   | [2]       |

|                   |      |                       |                              |      |     |
|-------------------|------|-----------------------|------------------------------|------|-----|
| PTZMP             | Dual | 8.18/453              | 0.03/505                     | 0.62 | [3] |
| CzPMBT            | Dual | $3.8 \times 10^4/415$ | 23.95/595                    | -    | [4] |
| ODBTCZ            | Dual | 11.84/430             | 414.65/569.4<br>412.29/615.2 | -    | [5] |
| IS-CBZ(Y-crystal) | Dual | 808.3/398             | 2.1/546                      | 6.7  | [6] |

---

$\tau_{DF}$  and  $\tau_p$ : Lifetimes of delayed fluorescence and phosphorescence measured at room temperature, respectively;  $\Phi_p$ : The phosphorescence quantum yield measured with an integrating sphere at room temperature; Solid state: powder (except IS-CBZ).

### 3. Theoretic calculations

**Table S2.** TD-DFT calculated singlet and triplet excited states transition configurations of **CzBI-OBN**.

| Excited State  | Energy(eV) | Transition configuration                                                                                                  |
|----------------|------------|---------------------------------------------------------------------------------------------------------------------------|
| S <sub>1</sub> | 3.2098     | H→L(97.84%)                                                                                                               |
| S <sub>2</sub> | 3.7312     | H-1→L(98.52%)                                                                                                             |
| S <sub>3</sub> | 3.9224     | H→L+1(69.18%) H→L+2(17.02%) H→L+4(10.04%)                                                                                 |
| S <sub>4</sub> | 3.9673     | H-1→L+7(4.78%) H→L+3(90.11%)                                                                                              |
| S <sub>5</sub> | 4.0002     | H→L+1(29.19%) H→L+2(39.01%) H→L+3(2.28%)<br>H→L+4(22.29%) H→L+5(5.14%)                                                    |
| T <sub>1</sub> | 2.0351     | H-3→L(2.02%) H-2→L(17.38%) H→L(74.56%)<br>H→L+1(2.29%)                                                                    |
| T <sub>2</sub> | 3.1693     | H-3→L+1(3.86%) H-2→L(61.87%) H→L(12.91%)<br>H→L+1(3.12%) H→L+3(4.62%) H→L+7(4.37%)                                        |
| T <sub>3</sub> | 3.1723     | H-4→L+3(4.29%) H-2→L+6(3.97%) H-1→L(6.75%)<br>H-1→L+3(67.01%) H→L+6(8.58%)<br>H-8→L+2(2.70%) H-3→L(9.24%) H-3→L+1(30.37%) |
| T <sub>4</sub> | 3.2717     | H-2→L+1(14.69%) H-2→L+3(2.41%) H→L(2.34%)<br>H→L+1(15.70%) H→L+3(14.13%)<br>H-3→L+1(4.48%) H-2→L(6.95%) H-2→L+1(3.12%)    |
| T <sub>5</sub> | 3.2992     | H-2→L+3(9.52%) H→L(3.97%) H→L+1(2.19%)<br>H→L+3(62.86%)                                                                   |
| T <sub>6</sub> | 3.4658     | H-5→L(2.01%) H-2→L+2(6.94%) H-2→L+4(5.30%)<br>H→L+2(42.59%) H→L+4(38.98%)                                                 |

|                 |        |                                                                                                                                                                                                     |
|-----------------|--------|-----------------------------------------------------------------------------------------------------------------------------------------------------------------------------------------------------|
| T <sub>7</sub>  | 3.5457 | H-1→L(89.63%) H-1→L+3(6.74%)                                                                                                                                                                        |
| T <sub>8</sub>  | 3.6953 | H-9→L(3.60%) H-8→L+2(2.27%) H-3→L+1(15.78%)<br>H→L(3.44%) H→L+1(60.05%) H→L+7(3.92%)<br>H-9→L(5.13%) H-3→L(6.03%) H-3→L+2(2.65%)                                                                    |
| T <sub>9</sub>  | 3.8636 | H-2→L+2(6.09%) H-2→L+7(2.20%) H→L+1(5.74%)<br>H→L+2(13.06%) H→L+4(21.86%) H→L+5(17.16%)<br>H→L+7(2.53%)<br>H-9→L(12.43%) H-7→L(3.11%) H-6→L+4(2.71%)<br>H-5→L+5(3.52%) H-3→L(10.74%) H-2→L+2(2.42%) |
| T <sub>10</sub> | 3.9310 | H-2→L+7(6.11%) H→L+1(6.18%) H→L+2(6.83%)<br>H→L+4(6.00%) H→L+5(10.17%) H→L+7(7.16%)<br>H→L+8(4.56%)                                                                                                 |

**Table S3.** TD-DFT calculated singlet and triplet excited states transition configurations of **CzBI-OBIN**.

| Excited State  | Energy(eV) | Transition configuration                              |
|----------------|------------|-------------------------------------------------------|
| S <sub>1</sub> | 3.1708     | H→L(98.38%)                                           |
| S <sub>2</sub> | 3.6143     | H-2→L(5.76%) H→L+1(91.07%)                            |
| S <sub>3</sub> | 3.7309     | H-1→L(99.46%)                                         |
| S <sub>4</sub> | 3.7510     | H-2→L(90.93%) H→L+1(5.74%)                            |
| S <sub>5</sub> | 3.9828     | H-1→L+8(4.80%) H→L+3(92.95%)                          |
| T <sub>1</sub> | 2.0006     | H-3→L(6.72%) H-1→L(85.06%) H→L(3.71%)<br>H-1←L(2.03%) |

|                 |        |                                                                                                                                                                        |
|-----------------|--------|------------------------------------------------------------------------------------------------------------------------------------------------------------------------|
| T <sub>2</sub>  | 2.9393 | H-3→L(3.48%) H-3→L+1(8.05%) H→L(62.52%)<br>H→L+1(17.24%)                                                                                                               |
| T <sub>3</sub>  | 3.1012 | H-5→L+4(2.37%) H-3→L+1(17.15%) H-1→L+1(3.38%)<br>H→L(33.15%) H→L+1(32.80%)                                                                                             |
| T <sub>4</sub>  | 3.1780 | H-9→L+12(3.33%) H-4→L+3(4.74%) H-4→L+10(2.16%)<br>H-2→L+3(72.12%) H→L+8(12.38%)                                                                                        |
| T <sub>5</sub>  | 3.3566 | H-4→L+8(3.80%) H-1→L+3(2.83%) H→L+3(83.69%)                                                                                                                            |
| T <sub>6</sub>  | 3.4336 | H-2→L(99.57%)<br>H-11→L(8.39%) H-9→L(3.32%) H-7→L(18.82%)                                                                                                              |
| T <sub>7</sub>  | 3.4477 | H-3→L(25.91%) H-1→L(4.22%) H-1→L+1(4.31%)<br>H-1→L+7(13.09%) H→L+1(5.52%) H→L+3(2.39%)<br>H-11→L(6.53%) H-11→L+1(2.13%) H-7→L(4.54%)                                   |
| T <sub>8</sub>  | 3.6510 | H-7→L+1(2.22%) H-6→L+2(2.12%) H-6→L+4(2.82%) H-6→L+5(2.84%) H-3→L+1(14.45%) H-3→L+9(2.00%) H-1→L+1(12.87%) H-1→L+7(4.23%) H-1→L+9(2.97%)<br>H→L+1(17.62%) H→L+9(6.09%) |
| T <sub>9</sub>  | 3.7621 | H-8→L(12.76%) H-1→L+2(61.68%) H-1→L+4(6.35%)<br>H→L+2(6.60%)                                                                                                           |
| T <sub>10</sub> | 3.8676 | H-11→L(4.00%) H-3→L(49.57%) H-1→L(4.94%)<br>H-1→L+1(10.70%) H-1→L+7(8.04%) H→L+4(2.05%)                                                                                |

**Table S4.** TD-DFT calculated singlet and triplet excited states transition configurations of **CzBI-ONAN**.

| Excited State  | Energy(eV) | Transition configuration |
|----------------|------------|--------------------------|
| S <sub>1</sub> | 3.1770     | H→L(99.53%)              |

|                |        |                                                                                                                                                            |
|----------------|--------|------------------------------------------------------------------------------------------------------------------------------------------------------------|
| S <sub>2</sub> | 3.5707 | H→L+1(97.50%)                                                                                                                                              |
| S <sub>3</sub> | 3.7245 | H-1→L(99.90%)                                                                                                                                              |
| S <sub>4</sub> | 3.8742 | H-5→L+2(2.69%) H-2→L(91.38%)                                                                                                                               |
| S <sub>5</sub> | 3.9850 | H→L+2(94.83%) H→L+4(2.16%)                                                                                                                                 |
| T <sub>1</sub> | 1.8183 | H-10→L+6(2.17%) H-3→L(19.23%) H-2→L(75.96%)<br>H→L(2.12%) H-2←L(3.02%)                                                                                     |
| T <sub>2</sub> | 2.8385 | H-3→L(3.72%) H→L(91.05%)<br>H-7→L+5(2.30%) H-6→L+4(3.19%) H-3→L+1(9.84%)                                                                                   |
| T <sub>3</sub> | 3.0544 | H-3→L+2(9.39%) H-2→L+1(6.03%) H-2→L+2(4.07%)<br>H→L(4.95%) H→L+1(26.18%) H→L+2(21.72%)                                                                     |
| T <sub>4</sub> | 3.1784 | H-9→L+12(2.28%) H-4→L+3(4.75%) H-4→L+10(2.06%)<br>H-1→L+3(72.14%) H→L+7(12.51%)                                                                            |
| T <sub>5</sub> | 3.3084 | H-1→L(99.81%)                                                                                                                                              |
| T <sub>6</sub> | 3.3344 | H-10→L(2.03%) H-5→L(19.51%) H-3→L(38.35%)<br>H-2→L(15.38%) H→L+3(10.76%)                                                                                   |
| T <sub>7</sub> | 4.1501 | H-5→L(3.66%) H-4→L+7(3.02%) H-3→L(5.46%)<br>H-2→L(2.27%) H-2→L+3(2.16%) H→L+3(75.83%)<br>H-10→L(12.26%) H-9→L(2.21%) H-8→L(3.92%)                          |
| T <sub>8</sub> | 3.3578 | H-5→L(6.13%) H-3→L(3.17%) H-3→L+1(5.40%)<br>H-3→L+2(3.44%) H-2→L+1(28.02%) H-2→L+2(23.08%)<br>H-2→L+6(5.41%)<br>H-7→L+4(6.36%) H-7→L+5(3.28%) H-5→L(8.33%) |
| T <sub>9</sub> | 3.4319 | H-3→L+1(5.52%) H-3→L+2(4.47%) H-3→L+8(2.76%)<br>H-2→L+1(17.20%) H-2→L+2(5.34%) H-2→L+8(2.12%)                                                              |

$T_{10}$                       3.6459

H→L+1(9.87%) H→L+2(10.90%) H→L+8(7.20%)  
H-11→L(4.33%) H-10→L(26.72%) H-8→L(2.00%)  
H-3→L(3.47%) H-3→L+1(2.65%) H-3→L+6(5.57%)  
H-2→L+1(10.95%) H-2→L+2(6.70%) H-2→L+6(18.45%)  
H→L+1(4.30%)

---

#### 4. X-Ray crystallographic data

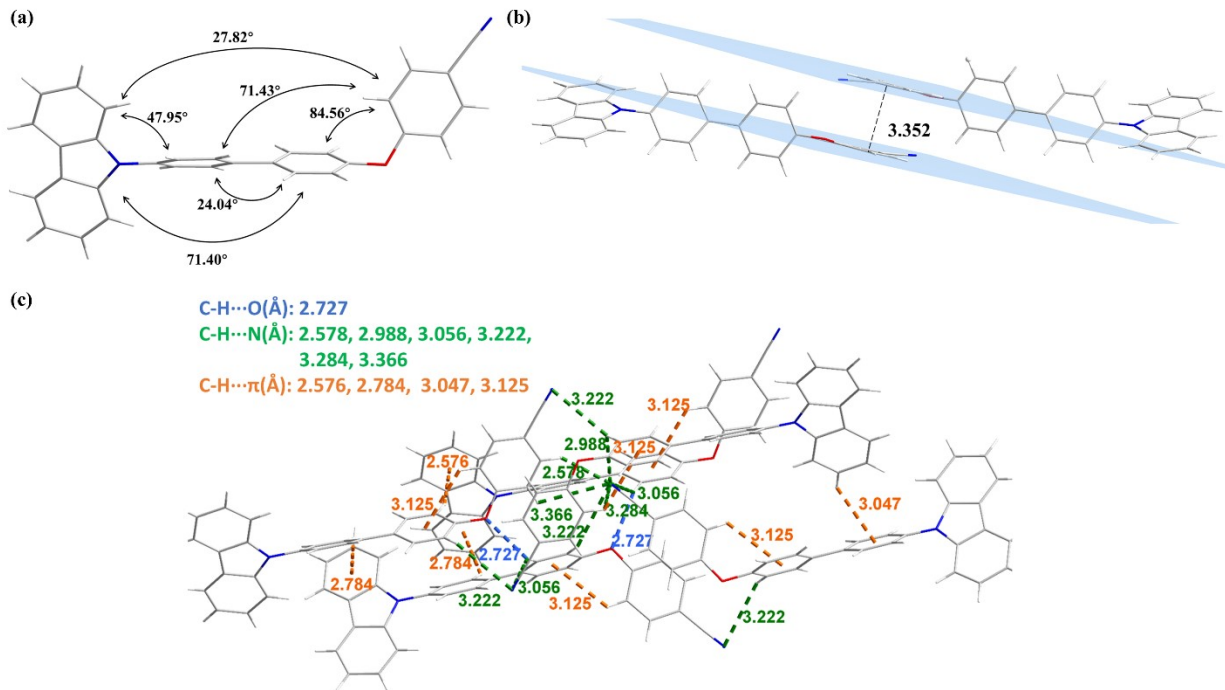

**Fig. S10.** (a) Twisted molecular conformation and dihedral angles of **CzBI-OBN** in single crystal structure; (b) The intermolecular interactions between adjacent molecules of **CzBI-OBN**. (dash black lines:  $\pi$ - $\pi$  interactions, Å); (c) Intermolecular interactions of **CzBI-OBN**. (Dash blue lines: C-H $\cdots$ O interactions; dash green lines: C-H $\cdots$ N interactions; dash orange lines: C-H $\cdots$  $\pi$  interactions, Å).

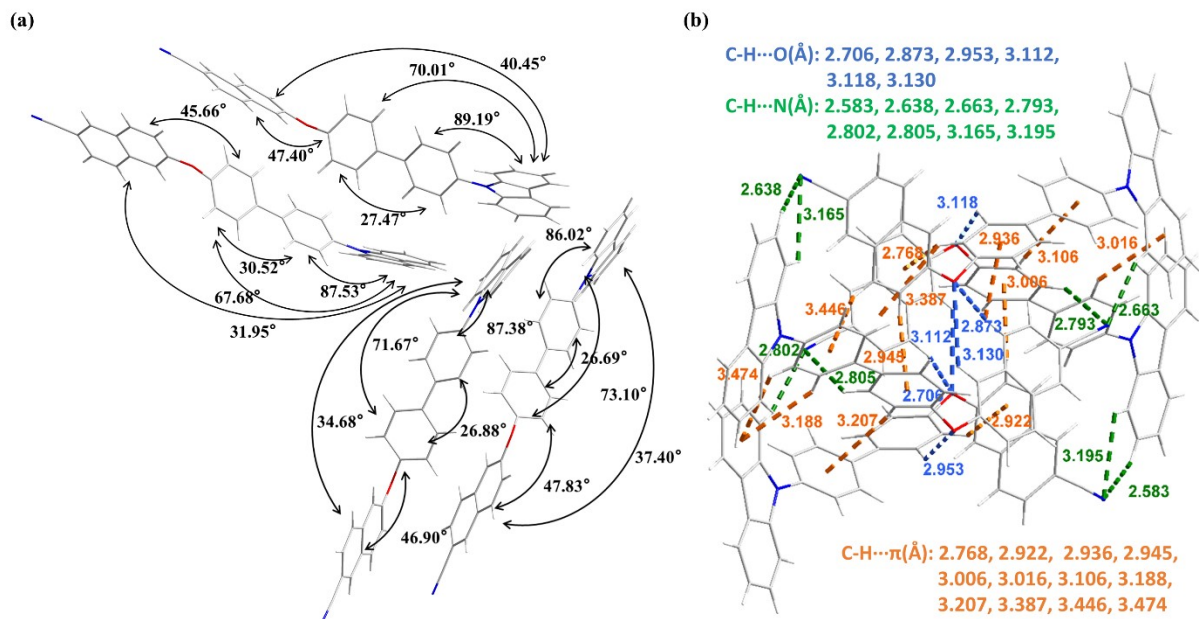

**Fig. S11.** (a) Twisted molecular conformation and dihedral angles of **CzBI-ONAN** in single crystal structure; (b) Intermolecular interactions of **CzBI-ONAN**. (Dash blue lines: C-H...O interactions; dash green lines: C-H...N interactions; dash orange lines: C-H... $\pi$  interactions, Å).

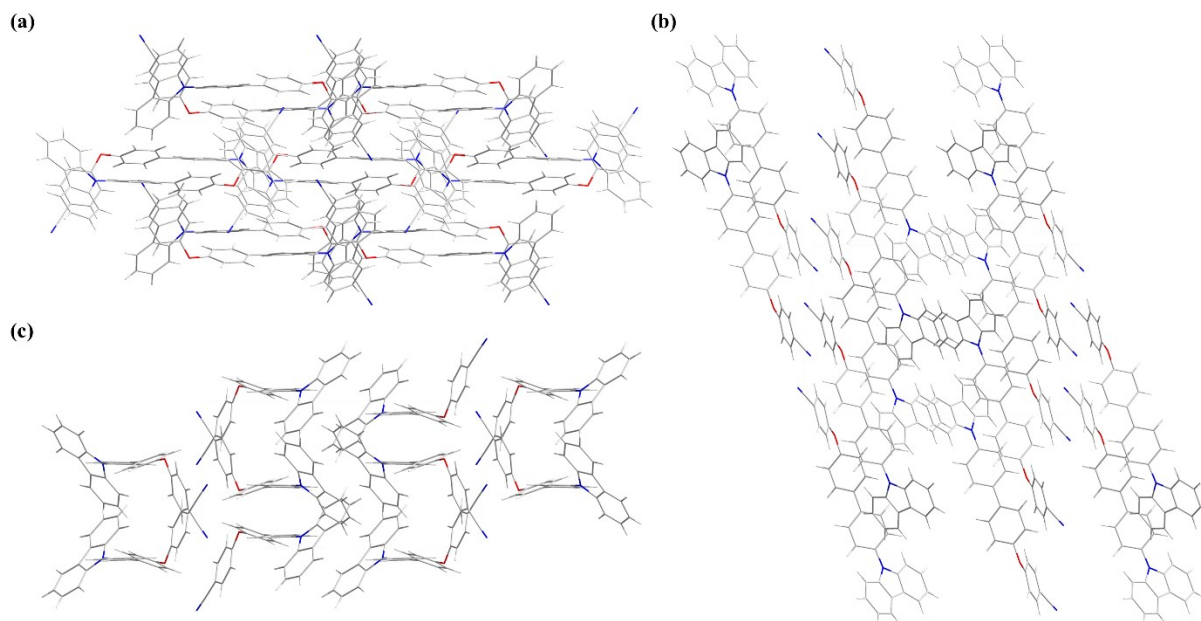

**Fig S12.** Views of molecular packing of **CzBI-OBN** from a axis (a), b axis (b) and c axis (c), respectively.

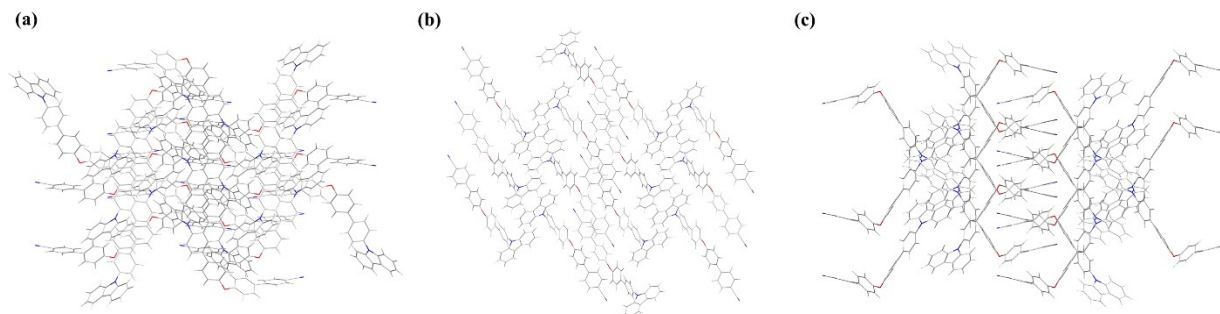

**Fig S13.** Views of molecular packing of **CzBI-OBIN** from a axis (a), b axis (b) and c axis (c), respectively.

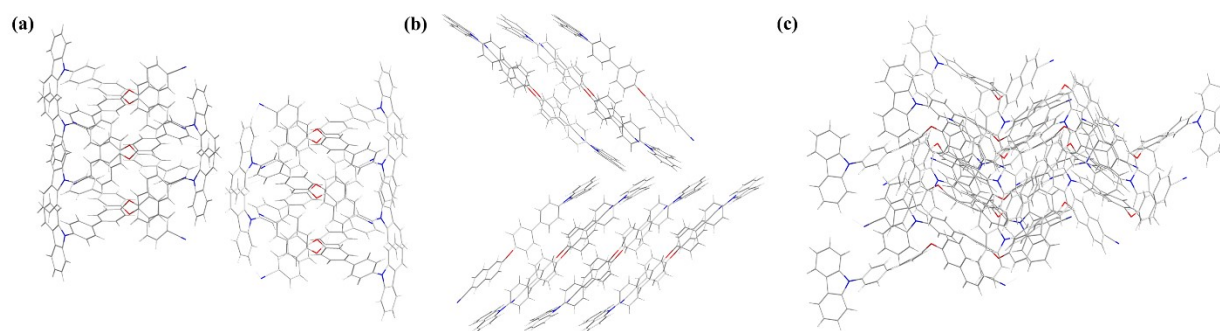

**Fig S14.** Views of molecular packing of **CzBI-ONAN** from a axis (a), b axis (b) and c axis (c), respectively.

**Table S5.** Crystal data and structure refinement for **CzBI-OBN**.

|                     |                    |
|---------------------|--------------------|
| Identification code | CzBI-OBN           |
| Empirical formula   | $C_{31}H_{20}N_2O$ |
| Formula weight      | 436.49             |
| Temperature/K       | 100.0(2)           |
| Crystal system      | monoclinic         |
| Space group         | $P2_1/c$           |
| a/Å                 | 18.7211(6)         |

|                                             |                                                                |
|---------------------------------------------|----------------------------------------------------------------|
| b/Å                                         | 9.7293(3)                                                      |
| c/Å                                         | 11.9442(4)                                                     |
| $\alpha$ /°                                 | 90                                                             |
| $\beta$ /°                                  | 94.5330(10)                                                    |
| $\gamma$ /°                                 | 90                                                             |
| Volume/Å <sup>3</sup>                       | 2168.75(12)                                                    |
| Z                                           | 4                                                              |
| $\rho_{\text{calc}}$ /g/cm <sup>3</sup>     | 1.337                                                          |
| $\mu$ /mm <sup>-1</sup>                     | 0.636                                                          |
| F(000)                                      | 912.0                                                          |
| Crystal size/mm <sup>3</sup>                | 0.2 × 0.17 × 0.15                                              |
| Radiation                                   | CuK $\alpha$ ( $\lambda$ = 1.54178)                            |
| 2 $\Theta$ range for data collection/°      | 4.734 to 150.002                                               |
| Index ranges                                | -23 ≤ h ≤ 23, -12 ≤ k ≤ 12, -14 ≤ l ≤ 14                       |
| Reflections collected                       | 46138                                                          |
| Independent reflections                     | 4415 [ $R_{\text{int}}$ = 0.0343, $R_{\text{sigma}}$ = 0.0196] |
| Data/restraints/parameters                  | 4415/0/307                                                     |
| Goodness-of-fit on F <sup>2</sup>           | 1.092                                                          |
| Final R indexes [ $I \geq 2\sigma(I)$ ]     | $R_1$ = 0.0408, $wR_2$ = 0.1005                                |
| Final R indexes [all data]                  | $R_1$ = 0.0412, $wR_2$ = 0.1008                                |
| Largest diff. peak/hole / e Å <sup>-3</sup> | 0.19/-0.39                                                     |

---

**Table S6.** Bond lengths for **CzBI-OBN**.

| Atom | Atom | Length/Å | Atom | Atom | Length/Å |
|------|------|----------|------|------|----------|
|------|------|----------|------|------|----------|

---

|     |     |            |     |     |            |
|-----|-----|------------|-----|-----|------------|
| O1  | C22 | 1.4024(13) | C13 | C18 | 1.3950(15) |
| O1  | C25 | 1.3707(13) | C14 | C15 | 1.3941(15) |
| N1  | C1  | 1.3947(14) | C15 | C16 | 1.4013(15) |
| N1  | C12 | 1.3972(14) | C16 | C17 | 1.4015(16) |
| N1  | C13 | 1.4221(13) | C16 | C19 | 1.4880(15) |
| N2  | C31 | 1.1486(16) | C17 | C18 | 1.3842(15) |
| C1  | C2  | 1.3951(16) | C19 | C20 | 1.3974(16) |
| C1  | C6  | 1.4096(15) | C19 | C24 | 1.4021(16) |
| C2  | C3  | 1.3860(16) | C20 | C21 | 1.3916(15) |
| C3  | C4  | 1.4048(16) | C21 | C22 | 1.3841(17) |
| C4  | C5  | 1.3823(17) | C22 | C23 | 1.3799(17) |
| C5  | C6  | 1.3993(16) | C23 | C24 | 1.3892(16) |
| C6  | C7  | 1.4447(16) | C25 | C26 | 1.3929(16) |
| C7  | C8  | 1.3973(15) | C25 | C30 | 1.3965(15) |
| C7  | C12 | 1.4128(15) | C26 | C27 | 1.3873(16) |
| C8  | C9  | 1.3827(17) | C27 | C28 | 1.3977(15) |
| C9  | C10 | 1.4025(17) | C28 | C29 | 1.3981(16) |
| C10 | C11 | 1.3891(16) | C28 | C31 | 1.4406(16) |
| C11 | C12 | 1.3970(16) | C29 | C30 | 1.3798(16) |
| C13 | C14 | 1.3897(16) |     |     |            |

**Table S7.** Bond angles for **CzBI-OBN**.

| Atom | Atom | Atom | Angle/°   | Atom | Atom | Atom | Angle/°    |
|------|------|------|-----------|------|------|------|------------|
| C25  | O1   | C22  | 117.84(8) | C14  | C15  | C16  | 121.18(10) |

|     |     |     |            |     |     |     |            |
|-----|-----|-----|------------|-----|-----|-----|------------|
| C1  | N1  | C12 | 108.40(9)  | C15 | C16 | C17 | 117.76(10) |
| C1  | N1  | C13 | 124.17(9)  | C15 | C16 | C19 | 121.95(10) |
| C12 | N1  | C13 | 126.52(9)  | C17 | C16 | C19 | 120.29(10) |
| N1  | C1  | C2  | 128.95(10) | C18 | C17 | C16 | 121.25(10) |
| N1  | C1  | C6  | 109.12(9)  | C17 | C18 | C13 | 120.31(10) |
| C2  | C1  | C6  | 121.90(10) | C20 | C19 | C16 | 121.33(10) |
| C3  | C2  | C1  | 117.45(10) | C20 | C19 | C24 | 117.89(10) |
| C2  | C3  | C4  | 121.37(11) | C24 | C19 | C16 | 120.77(10) |
| C5  | C4  | C3  | 120.87(10) | C21 | C20 | C19 | 121.16(10) |
| C4  | C5  | C6  | 118.91(10) | C22 | C21 | C20 | 119.20(10) |
| C1  | C6  | C7  | 106.74(9)  | C21 | C22 | O1  | 119.25(10) |
| C5  | C6  | C1  | 119.45(10) | C23 | C22 | O1  | 119.39(10) |
| C5  | C6  | C7  | 133.80(10) | C23 | C22 | C21 | 121.30(10) |
| C8  | C7  | C6  | 133.40(11) | C22 | C23 | C24 | 119.05(11) |
| C8  | C7  | C12 | 119.53(10) | C23 | C24 | C19 | 121.40(11) |
| C12 | C7  | C6  | 107.02(9)  | O1  | C25 | C26 | 123.93(10) |
| C9  | C8  | C7  | 119.16(11) | O1  | C25 | C30 | 115.26(10) |
| C8  | C9  | C10 | 120.64(11) | C26 | C25 | C30 | 120.77(10) |
| C11 | C10 | C9  | 121.61(11) | C27 | C26 | C25 | 119.25(10) |
| C10 | C11 | C12 | 117.40(11) | C26 | C27 | C28 | 120.15(10) |
| N1  | C12 | C7  | 108.71(10) | C27 | C28 | C29 | 120.09(10) |
| C11 | C12 | N1  | 129.56(10) | C27 | C28 | C31 | 120.34(10) |
| C11 | C12 | C7  | 121.67(10) | C29 | C28 | C31 | 119.49(10) |
| C14 | C13 | N1  | 121.46(10) | C30 | C29 | C28 | 119.84(10) |
| C14 | C13 | C18 | 119.42(10) | C29 | C30 | C25 | 119.82(10) |

|     |     |     |            |    |     |     |            |
|-----|-----|-----|------------|----|-----|-----|------------|
| C18 | C13 | N1  | 119.12(10) | N2 | C31 | C28 | 177.79(13) |
| C13 | C14 | C15 | 120.04(10) |    |     |     |            |

---

**Table S8.** Crystal data and structure refinement for **CzBI-OBIN**.

|                                    |                                                  |
|------------------------------------|--------------------------------------------------|
| Identification code                | CzBI-OBIN                                        |
| Empirical formula                  | C <sub>37</sub> H <sub>24</sub> N <sub>2</sub> O |
| Formula weight                     | 512.58                                           |
| Temperature/K                      | 193.00                                           |
| Crystal system                     | monoclinic                                       |
| Space group                        | P2 <sub>1</sub> /c                               |
| a/Å                                | 21.1022(7)                                       |
| b/Å                                | 7.4454(3)                                        |
| c/Å                                | 17.2701(6)                                       |
| α/°                                | 90                                               |
| β/°                                | 97.501(2)                                        |
| γ/°                                | 90                                               |
| Volume/Å <sup>3</sup>              | 2690.16(17)                                      |
| Z                                  | 4                                                |
| ρ <sub>calc</sub> /cm <sup>3</sup> | 1.266                                            |
| μ/mm <sup>-1</sup>                 | 0.594                                            |
| F(000)                             | 1072.0                                           |
| Crystal size/mm <sup>3</sup>       | 0.11 × 0.08 × 0.08                               |
| Radiation                          | CuKα (λ = 1.54178)                               |
| 2θ range for data collection/°     | 4.224 to 136.846                                 |

|                                             |                                                               |
|---------------------------------------------|---------------------------------------------------------------|
| Index ranges                                | -22 ≤ h ≤ 25, -8 ≤ k ≤ 6, -20 ≤ l ≤ 20                        |
| Reflections collected                       | 26081                                                         |
| Independent reflections                     | 4875 [R <sub>int</sub> = 0.0717, R <sub>sigma</sub> = 0.0467] |
| Data/restraints/parameters                  | 4875/0/361                                                    |
| Goodness-of-fit on F <sup>2</sup>           | 1.100                                                         |
| Final R indexes [I ≥ 2σ (I)]                | R <sub>1</sub> = 0.0465, wR <sub>2</sub> = 0.1086             |
| Final R indexes [all data]                  | R <sub>1</sub> = 0.0625, wR <sub>2</sub> = 0.1154             |
| Largest diff. peak/hole / e Å <sup>-3</sup> | 0.20/-0.22                                                    |

**Table S9.** Bond lengths for **CzBI-OBIN**.

| Atom | Atom | Length/Å | Atom | Atom | Length/Å |
|------|------|----------|------|------|----------|
| O1   | C22  | 1.394(2) | C16  | C17  | 1.396(2) |
| O1   | C25  | 1.392(2) | C16  | C19  | 1.482(2) |
| N1   | C1   | 1.389(2) | C17  | C18  | 1.380(3) |
| N1   | C12  | 1.396(2) | C19  | C20  | 1.396(2) |
| N1   | C13  | 1.424(2) | C19  | C24  | 1.398(2) |
| N2   | C37  | 1.140(3) | C20  | C21  | 1.380(2) |
| C1   | C2   | 1.390(2) | C21  | C22  | 1.380(3) |
| C1   | C6   | 1.407(2) | C22  | C23  | 1.381(2) |
| C2   | C3   | 1.383(3) | C23  | C24  | 1.388(2) |
| C3   | C4   | 1.392(3) | C25  | C26  | 1.378(3) |
| C4   | C5   | 1.378(3) | C25  | C30  | 1.381(3) |
| C5   | C6   | 1.398(2) | C26  | C27  | 1.389(3) |
| C6   | C7   | 1.446(2) | C27  | C28  | 1.394(3) |

|     |     |          |     |     |          |
|-----|-----|----------|-----|-----|----------|
| C7  | C8  | 1.396(2) | C28 | C29 | 1.400(2) |
| C7  | C12 | 1.406(2) | C28 | C31 | 1.486(2) |
| C8  | C9  | 1.376(3) | C29 | C30 | 1.382(3) |
| C9  | C10 | 1.393(3) | C31 | C32 | 1.399(2) |
| C10 | C11 | 1.383(3) | C31 | C36 | 1.399(2) |
| C11 | C12 | 1.388(2) | C32 | C33 | 1.377(3) |
| C13 | C14 | 1.382(2) | C33 | C34 | 1.389(3) |
| C13 | C18 | 1.383(3) | C34 | C35 | 1.387(3) |
| C14 | C15 | 1.383(2) | C34 | C37 | 1.445(3) |
| C15 | C16 | 1.389(2) | C35 | C36 | 1.378(3) |

**Table S10.** Bond angles for **CzBI-OBIN**.

| Atom | Atom | Atom | Angle/°    | Atom | Atom | Atom | Angle/°    |
|------|------|------|------------|------|------|------|------------|
| C25  | O1   | C22  | 116.49(14) | C17  | C18  | C13  | 120.27(16) |
| C1   | N1   | C12  | 108.57(14) | C20  | C19  | C16  | 120.28(15) |
| C1   | N1   | C13  | 124.87(14) | C20  | C19  | C24  | 117.62(16) |
| C12  | N1   | C13  | 126.47(14) | C24  | C19  | C16  | 122.09(15) |
| N1   | C1   | C2   | 128.70(16) | C21  | C20  | C19  | 121.82(16) |
| N1   | C1   | C6   | 108.92(15) | C22  | C21  | C20  | 119.11(16) |
| C2   | C1   | C6   | 122.36(16) | C21  | C22  | O1   | 120.87(16) |
| C3   | C2   | C1   | 117.05(18) | C21  | C22  | C23  | 120.94(16) |
| C2   | C3   | C4   | 121.55(18) | C23  | C22  | O1   | 118.06(16) |
| C5   | C4   | C3   | 121.22(18) | C22  | C23  | C24  | 119.48(16) |
| C4   | C5   | C6   | 118.78(18) | C23  | C24  | C19  | 121.03(16) |

|     |     |     |            |     |     |     |            |
|-----|-----|-----|------------|-----|-----|-----|------------|
| C1  | C6  | C7  | 106.89(15) | C26 | C25 | O1  | 118.24(17) |
| C5  | C6  | C1  | 119.03(16) | C26 | C25 | C30 | 120.80(17) |
| C5  | C6  | C7  | 134.08(17) | C30 | C25 | O1  | 120.88(16) |
| C8  | C7  | C6  | 133.92(17) | C25 | C26 | C27 | 119.33(18) |
| C8  | C7  | C12 | 119.21(17) | C26 | C27 | C28 | 121.15(17) |
| C12 | C7  | C6  | 106.83(15) | C27 | C28 | C29 | 118.11(17) |
| C9  | C8  | C7  | 118.70(19) | C27 | C28 | C31 | 121.82(16) |
| C8  | C9  | C10 | 121.26(18) | C29 | C28 | C31 | 120.08(16) |
| C11 | C10 | C9  | 121.42(18) | C30 | C29 | C28 | 120.87(18) |
| C10 | C11 | C12 | 117.11(19) | C25 | C30 | C29 | 119.71(17) |
| N1  | C12 | C7  | 108.79(14) | C32 | C31 | C28 | 121.69(15) |
| C11 | C12 | N1  | 128.91(17) | C36 | C31 | C28 | 120.41(15) |
| C11 | C12 | C7  | 122.27(16) | C36 | C31 | C32 | 117.89(16) |
| C14 | C13 | N1  | 119.54(16) | C33 | C32 | C31 | 121.02(17) |
| C14 | C13 | C18 | 119.91(16) | C32 | C33 | C34 | 120.02(17) |
| C18 | C13 | N1  | 120.53(15) | C33 | C34 | C37 | 120.47(17) |
| C13 | C14 | C15 | 119.39(16) | C35 | C34 | C33 | 119.94(17) |
| C14 | C15 | C16 | 121.83(15) | C35 | C34 | C37 | 119.59(17) |
| C15 | C16 | C17 | 117.68(16) | C36 | C35 | C34 | 119.77(17) |
| C15 | C16 | C19 | 120.12(15) | C35 | C36 | C31 | 121.33(16) |
| C17 | C16 | C19 | 122.19(16) | N2  | C37 | C34 | 178.6(3)   |
| C18 | C17 | C16 | 120.89(17) |     |     |     |            |

**Table S11.** Crystal data and structure refinement for **CzBI-ONAN**.

| Identification code                | <b>CzBI-ONAN</b>                                               |
|------------------------------------|----------------------------------------------------------------|
| Empirical formula                  | C <sub>35</sub> H <sub>22</sub> N <sub>2</sub> O               |
| Formula weight                     | 486.54                                                         |
| Temperature/K                      | 193.00                                                         |
| Crystal system                     | monoclinic                                                     |
| Space group                        | P2 <sub>1</sub>                                                |
| a/Å                                | 12.414(2)                                                      |
| b/Å                                | 10.7894(18)                                                    |
| c/Å                                | 37.137(7)                                                      |
| α/°                                | 90                                                             |
| β/°                                | 99.503(6)                                                      |
| γ/°                                | 90                                                             |
| Volume/Å <sup>3</sup>              | 4905.9(15)                                                     |
| Z                                  | 8                                                              |
| ρ <sub>calc</sub> /cm <sup>3</sup> | 1.317                                                          |
| μ/mm <sup>-1</sup>                 | 0.412                                                          |
| F(000)                             | 2032.0                                                         |
| Crystal size/mm <sup>3</sup>       | 0.12 × 0.1 × 0.08                                              |
| Radiation                          | GaKα (λ = 1.34139)                                             |
| 2θ range for data collection/°     | 4.198 to 110.284                                               |
| Index ranges                       | -13 ≤ h ≤ 15, -12 ≤ k ≤ 13, -45 ≤ l ≤ 44                       |
| Reflections collected              | 34419                                                          |
| Independent reflections            | 16086 [R <sub>int</sub> = 0.1208, R <sub>sigma</sub> = 0.1701] |
| Data/restraints/parameters         | 16086/1285/1371                                                |
| Goodness-of-fit on F <sup>2</sup>  | 0.996                                                          |

|                                                |                                  |
|------------------------------------------------|----------------------------------|
| Final R indexes [ $I \geq 2\sigma(I)$ ]        | $R_1 = 0.0931$ , $wR_2 = 0.2345$ |
| Final R indexes [all data]                     | $R_1 = 0.1916$ , $wR_2 = 0.2978$ |
| Largest diff. peak/hole / $e \text{ \AA}^{-3}$ | 0.39/-0.36                       |
| Flack parameter                                | 0.9(8)                           |

---

**Table S12.** Main bond lengths for **CzBI-ONAN**.

| Atom | Atom | Length/ $\text{\AA}$ | Atom | Atom | Length/ $\text{\AA}$ |
|------|------|----------------------|------|------|----------------------|
| O1   | C22  | 1.407(19)            | O3   | C92  | 1.42(2)              |
| O1   | C25  | 1.385(19)            | O3   | C95  | 1.397(19)            |
| N1   | C1   | 1.399(19)            | N5   | C71  | 1.421(19)            |
| N1   | C8   | 1.392(18)            | N5   | C74  | 1.386(19)            |
| N1   | C13  | 1.442(19)            | N5   | C83  | 1.46(2)              |
| N2   | C35  | 1.15(2)              | N6   | C105 | 1.18(2)              |
| C1   | C2   | 1.45(2)              | C73  | C78  | 1.40(2)              |
| C1   | C12  | 1.38(2)              | C79  | C80  | 1.34(2)              |
| C2   | C9   | 1.37(2)              | C84  | C85  | 1.383(19)            |
| C3   | C8   | 1.40(2)              | C86  | C89  | 1.50(2)              |
| C9   | C10  | 1.33(2)              | C89  | C94  | 1.38(2)              |
| C13  | C18  | 1.36(2)              | C95  | C104 | 1.42(2)              |
| C16  | C19  | 1.47(2)              | C97  | C98  | 1.429(19)            |
| C28  | C33  | 1.43(2)              | C97  | C102 | 1.46(2)              |
| O2   | C55  | 1.389(18)            | O4   | C127 | 1.387(19)            |
| O2   | C60  | 1.372(19)            | O4   | C130 | 1.367(19)            |
| N3   | C36  | 1.424(18)            | N7   | C106 | 1.43(2)              |

|     |     |           |      |      |           |
|-----|-----|-----------|------|------|-----------|
| N3  | C43 | 1.420(18) | N7   | C109 | 1.372(19) |
| N3  | C48 | 1.414(19) | N7   | C118 | 1.40(2)   |
| N4  | C70 | 1.148(19) | N8   | C140 | 1.13(2)   |
| C36 | C41 | 1.39(2)   | C106 | C117 | 1.36(2)   |
| C42 | C47 | 1.34(2)   | C107 | C114 | 1.39(2)   |
| C52 | C57 | 1.40(2)   | C118 | C123 | 1.42(2)   |
| C60 | C69 | 1.37(2)   | C130 | C139 | 1.41(2)   |
| C65 | C70 | 1.42(2)   | C135 | C140 | 1.45(2)   |
| C67 | C68 | 1.440(19) |      |      |           |

---

**Table S13.** Main bond angles for **CzBI-ONAN**.

| Atom | Atom | Atom | Angle/°   | Atom | Atom | Atom | Angle/°   |
|------|------|------|-----------|------|------|------|-----------|
| C25  | O1   | C22  | 119.0(11) | C95  | O3   | C92  | 119.0(12) |
| C1   | N1   | C13  | 124.0(13) | C74  | N5   | C83  | 127.0(14) |
| C8   | N1   | C1   | 109.3(12) | C72  | C71  | N5   | 106.5(14) |
| C12  | C1   | N1   | 129.8(15) | C82  | C71  | N5   | 130.7(16) |
| C9   | C2   | C1   | 116.7(15) | C73  | C72  | C79  | 132.2(16) |
| C9   | C2   | C3   | 136.3(16) | C81  | C82  | C71  | 117.2(18) |
| N1   | C8   | C3   | 108.3(14) | C88  | C83  | N5   | 119.7(16) |
| C1   | C12  | C11  | 115.1(17) | C85  | C86  | C89  | 122.7(15) |
| C24  | C19  | C16  | 121.6(14) | C94  | C89  | C86  | 120.9(15) |
| C23  | C22  | O1   | 117.9(16) | C93  | C92  | O3   | 117.0(15) |
| O1   | C25  | C26  | 113.9(13) | O3   | C95  | C104 | 110.2(13) |
| N2   | C35  | C30  | 177(2)    | C101 | C100 | C105 | 119.5(16) |

|     |     |     |           |      |      |      |           |
|-----|-----|-----|-----------|------|------|------|-----------|
| C60 | O2  | C55 | 122.5(11) | N6   | C105 | C100 | 176.6(19) |
| C43 | N3  | C36 | 105.9(12) | C130 | O4   | C127 | 119.8(11) |
| C37 | C36 | N3  | 129.2(15) | C109 | N7   | C118 | 127.5(15) |
| C37 | C36 | C41 | 120.8(15) | C117 | C106 | N7   | 132.3(16) |
| C41 | C36 | N3  | 110.1(13) | C113 | C108 | C107 | 137.1(17) |
| C47 | C42 | C41 | 131.6(16) | N7   | C109 | C108 | 109.6(14) |
| C42 | C43 | N3  | 112.2(14) | N7   | C109 | C110 | 128.3(16) |
| C44 | C43 | N3  | 128.0(14) | C106 | C117 | C116 | 119.3(18) |
| C49 | C48 | N3  | 118.8(15) | N7   | C118 | C123 | 120.1(16) |
| C53 | C52 | C57 | 116.3(14) | C125 | C124 | C129 | 116.3(15) |
| O2  | C55 | C56 | 118.4(17) | O4   | C127 | C128 | 119.9(17) |
| C52 | C57 | C56 | 122.8(14) | O4   | C130 | C131 | 124.4(15) |
| O2  | C60 | C61 | 115.0(14) | C132 | C137 | C138 | 118.8(14) |
| N4  | C70 | C65 | 176.8(19) | N8   | C140 | C135 | 178(2)    |

---

## 5. $^1\text{H}$ NMR, $^{13}\text{C}$ NMR and HRMS spectrum

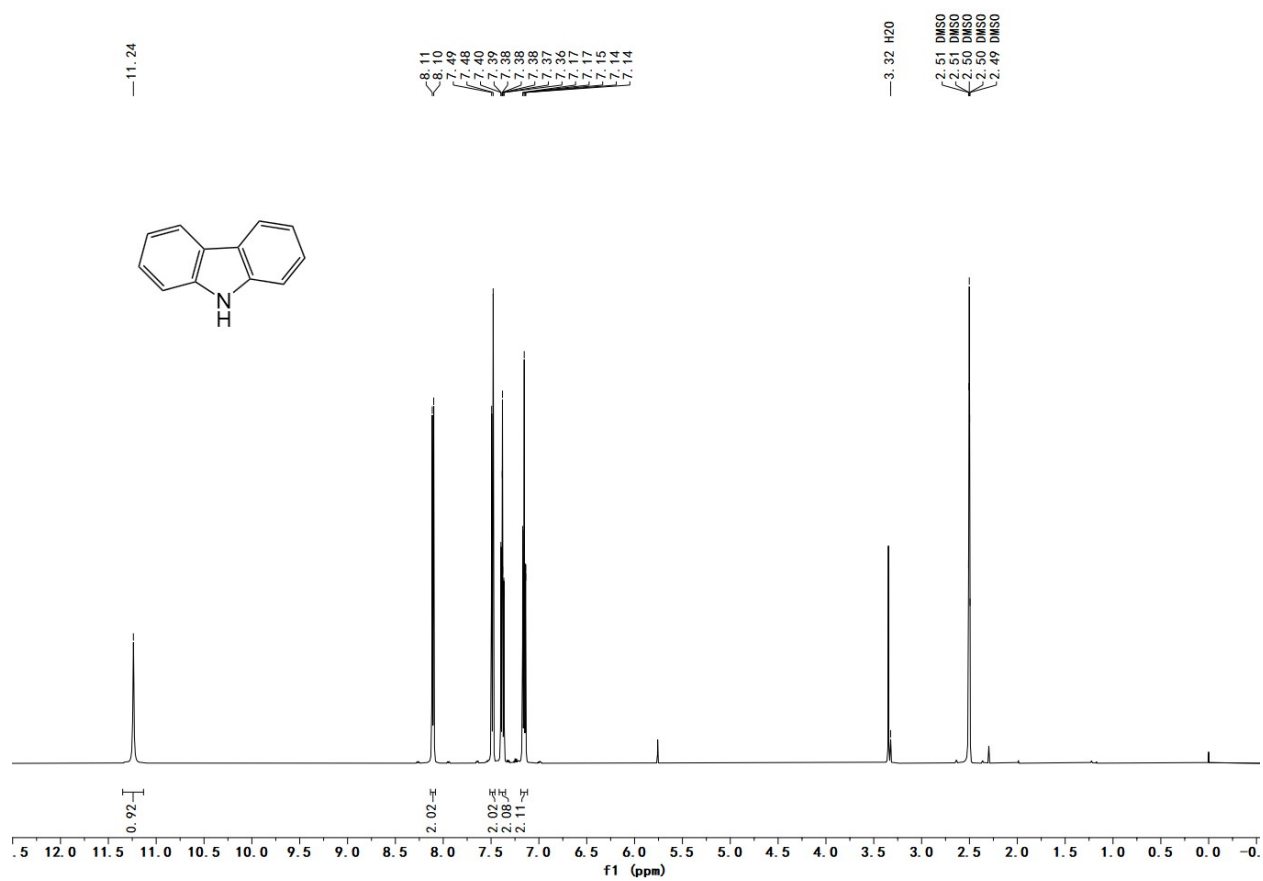

**Fig S15.**  $^1\text{H}$  NMR spectrum (500 MHz, DMSO- $d_6$ ) of carbazole.

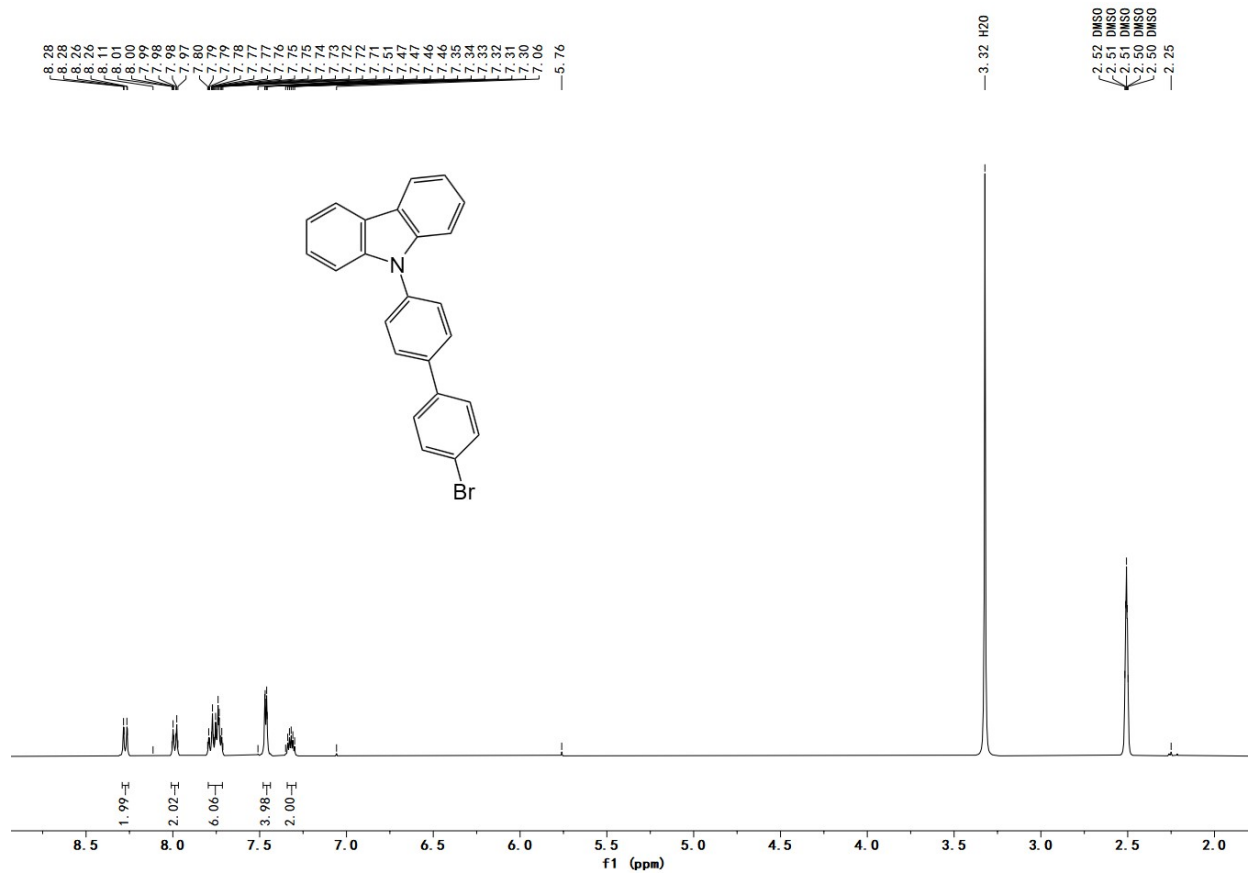

**Fig S16.** <sup>1</sup>H NMR spectrum (400 MHz, DMSO-d<sub>6</sub>) of CzBI-Br.

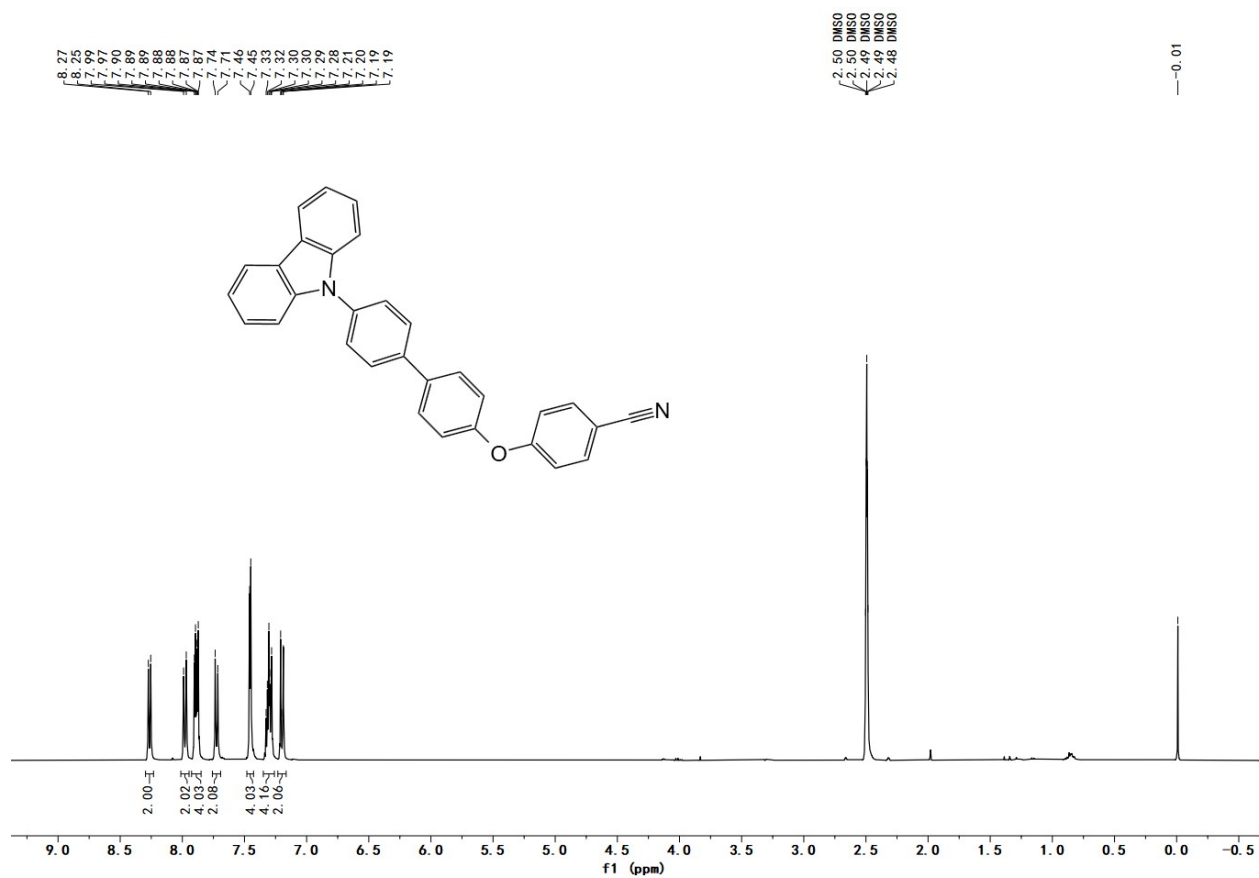

**Fig S17.** <sup>1</sup>H NMR spectrum (400 MHz, DMSO-d<sub>6</sub>) of CzBI-OBN.

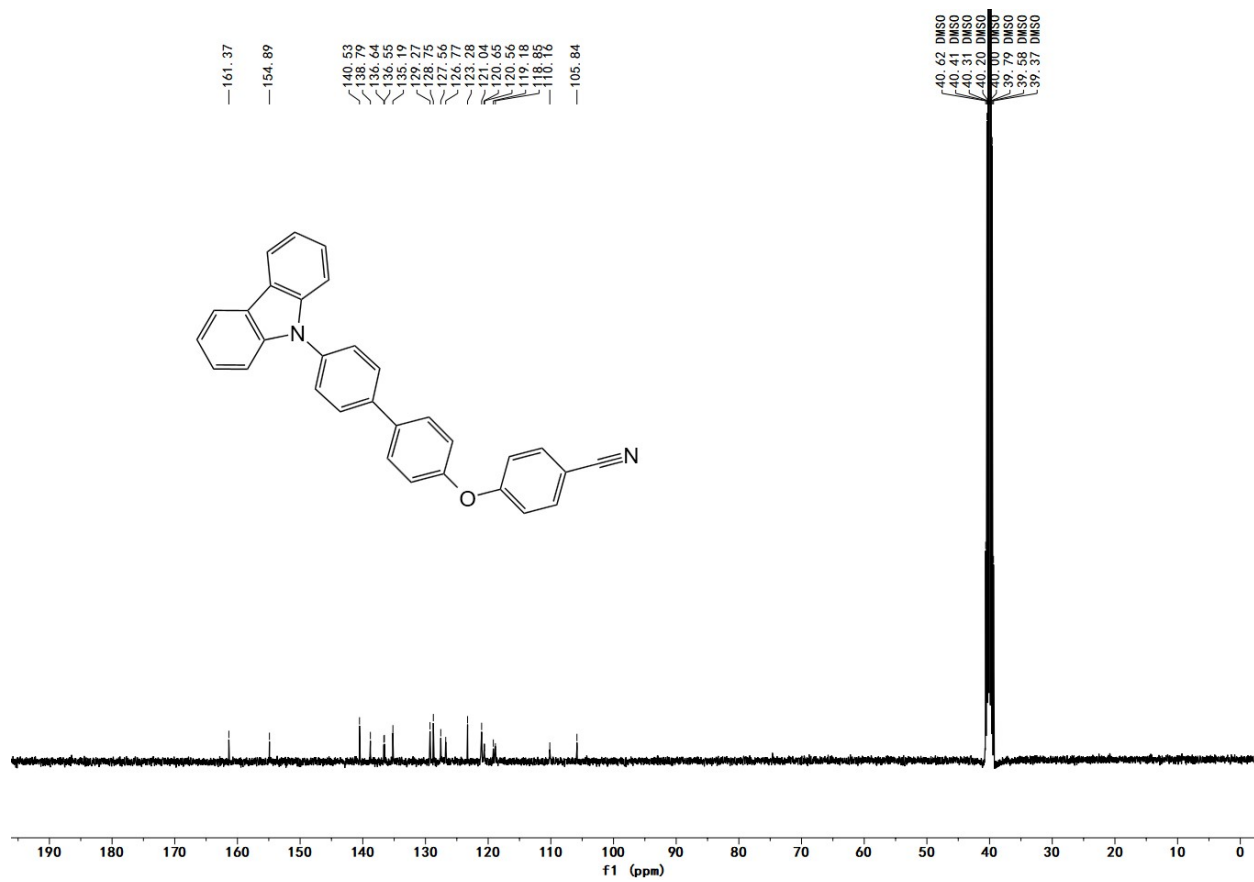

**Fig S18.** <sup>13</sup>C NMR spectrum (101 MHz, DMSO-d<sub>6</sub>) of CzBI-OBN.

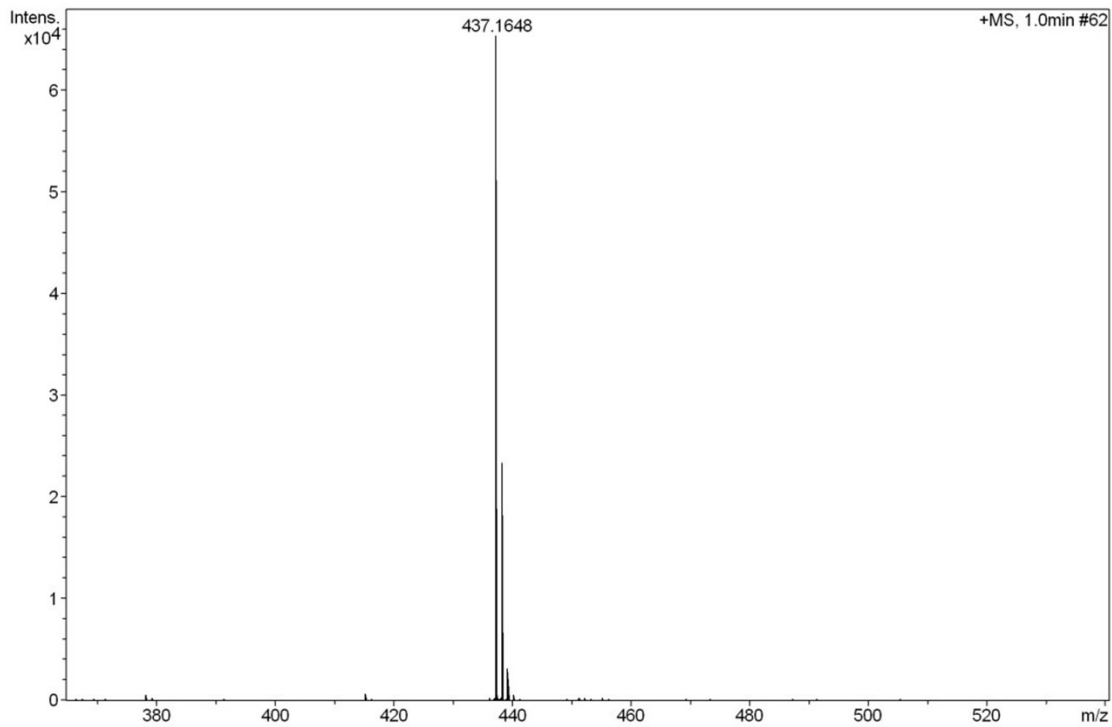

**Fig S19.** HRMS spectrum of **CzBI-OBN**.

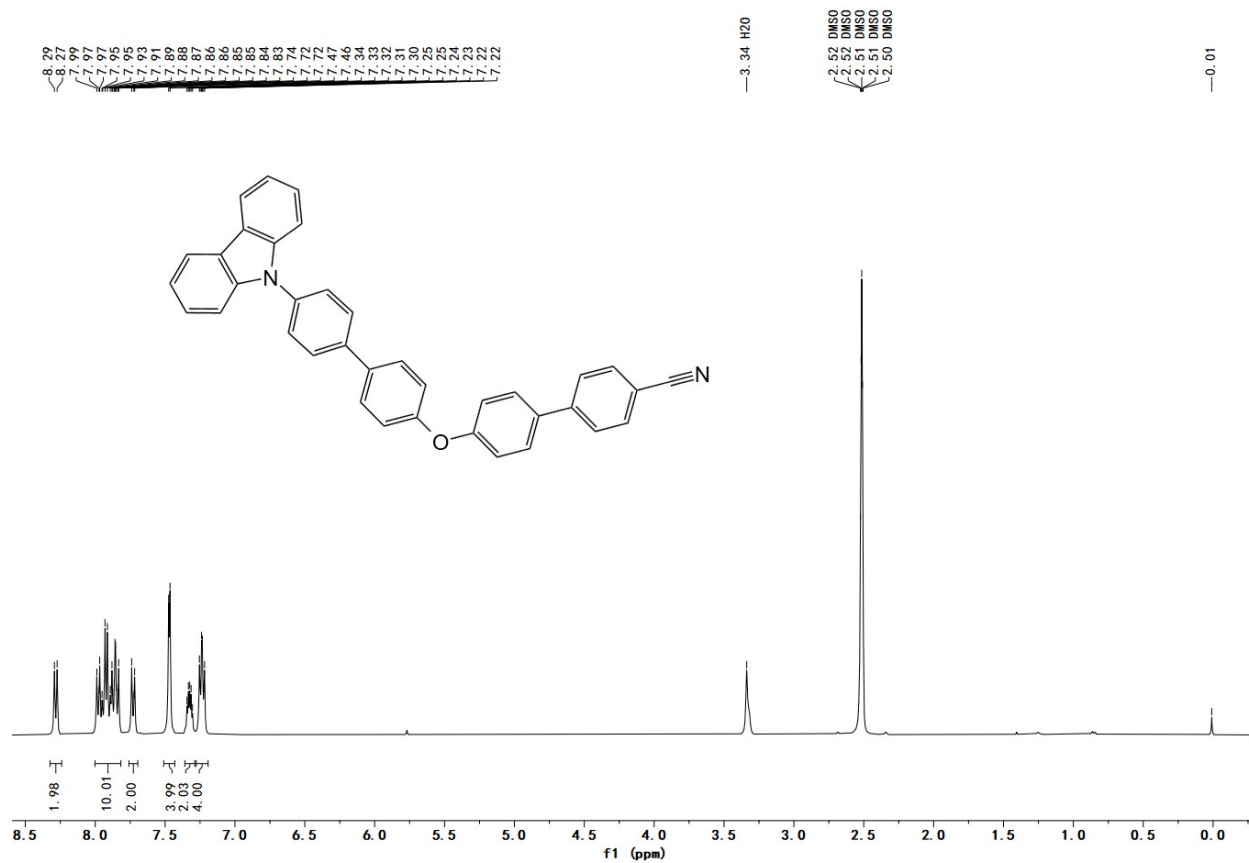

**Fig S20.** <sup>1</sup>H NMR spectrum (400 MHz, DMSO-d<sub>6</sub>) of CzBI-OBIN.

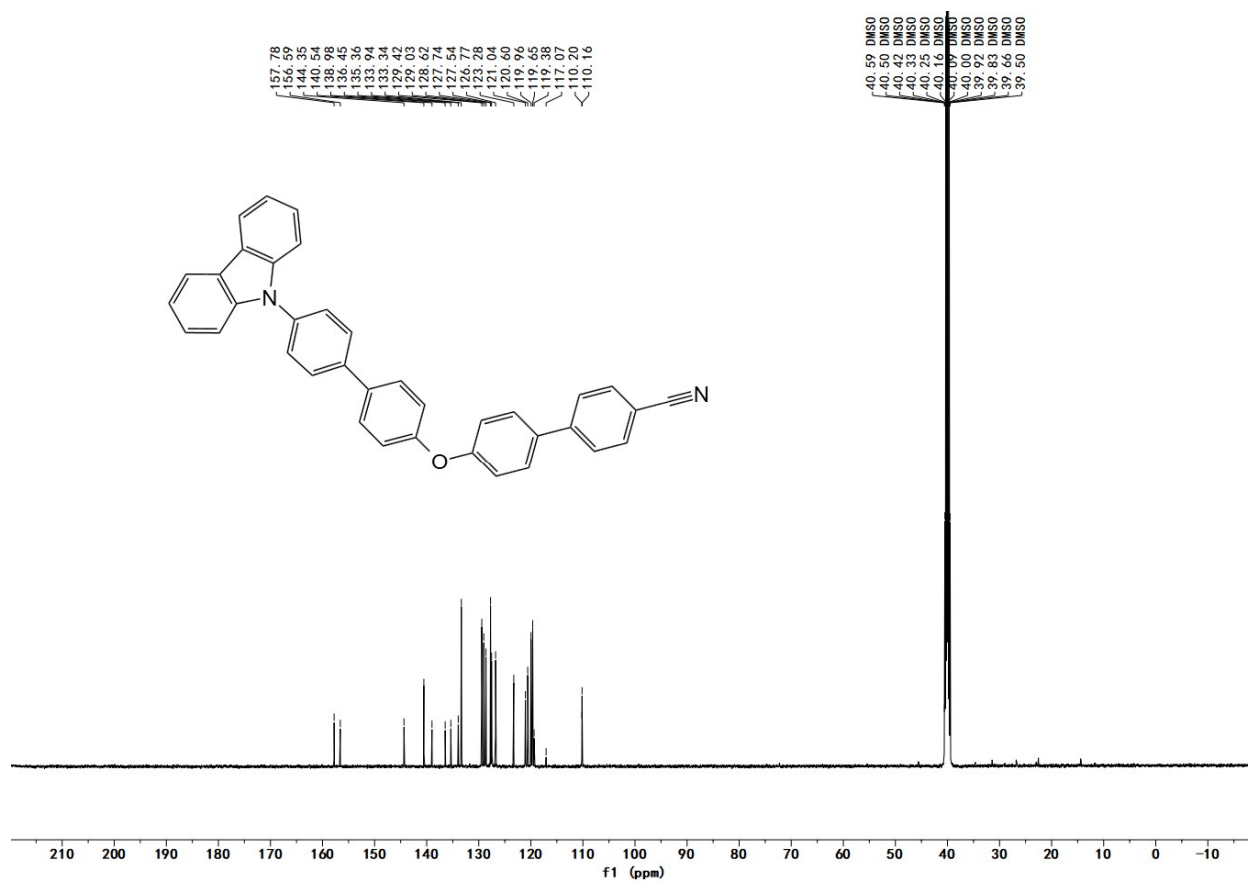

**Fig S21.** <sup>13</sup>C NMR spectrum (126 MHz, DMSO-d<sub>6</sub>) of CzBI-OBIN.

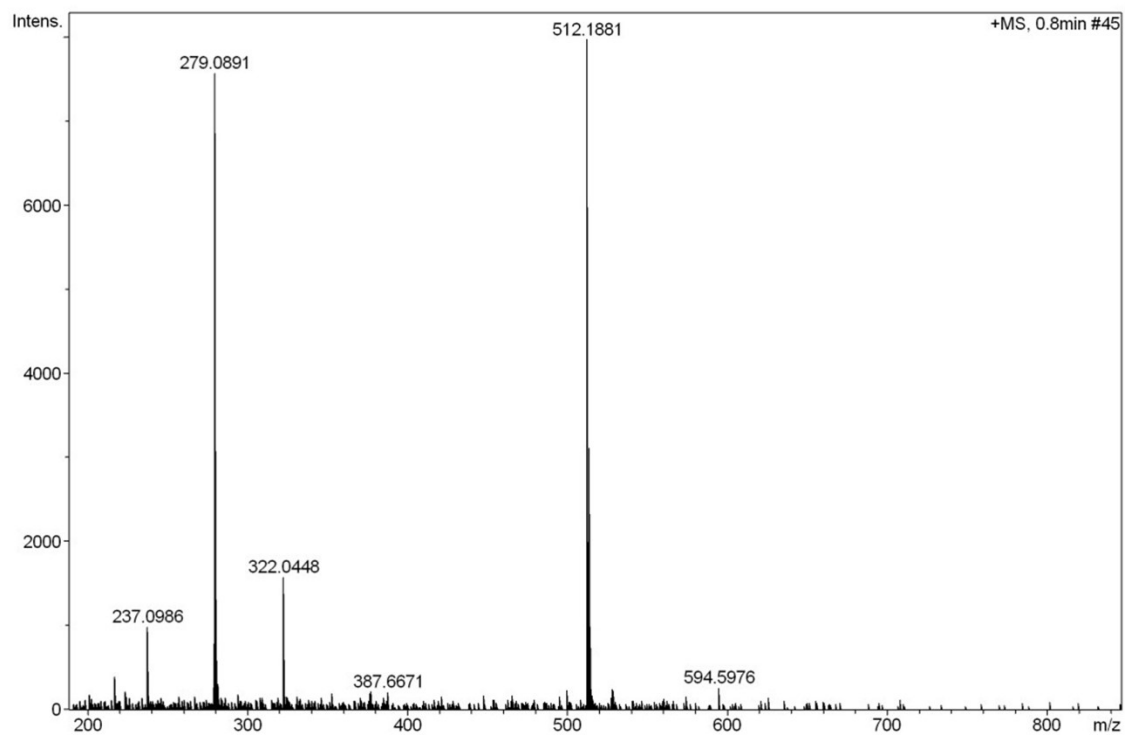

**Fig S22.** HRMS spectrum of **CzBI-OBIN**.

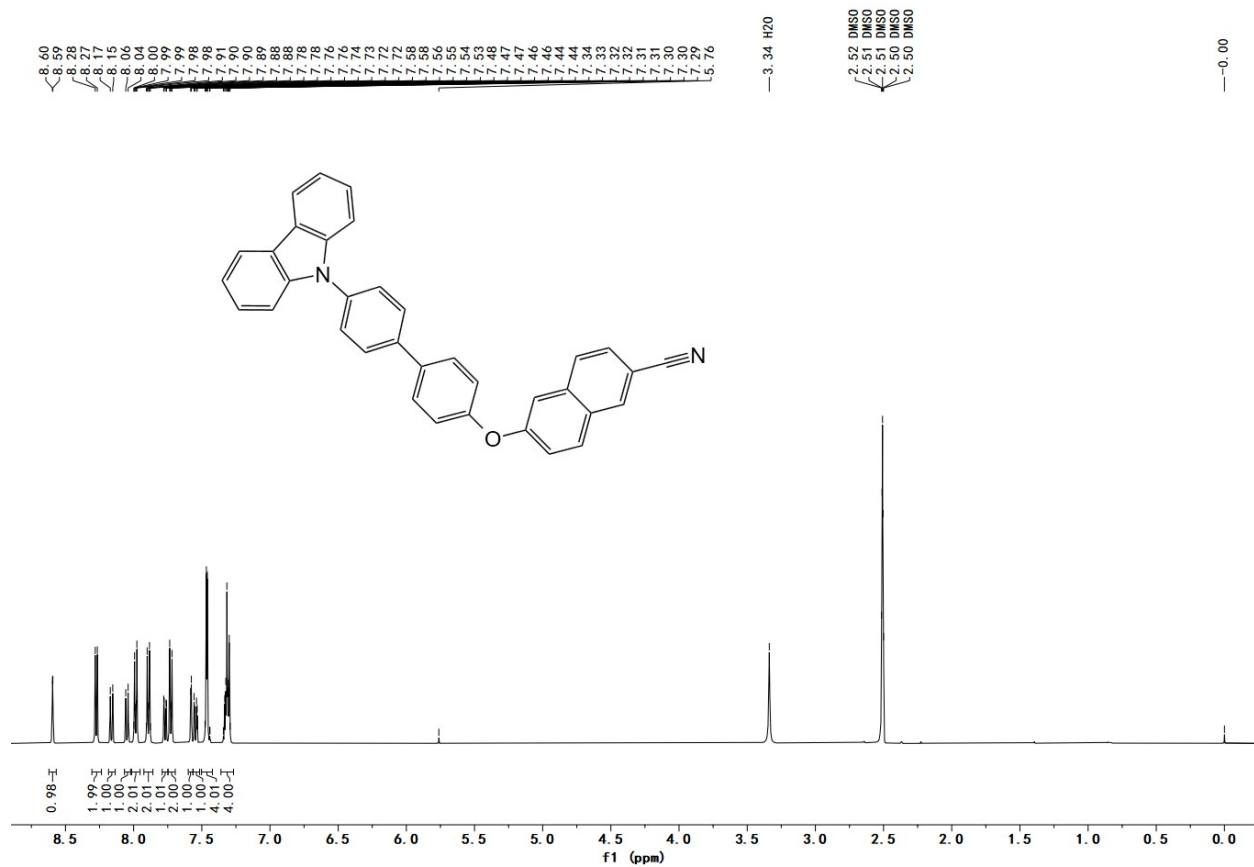

**Fig S23.** <sup>1</sup>H NMR spectrum (500 MHz, DMSO-d<sub>6</sub>) of CzBI-ONAN.

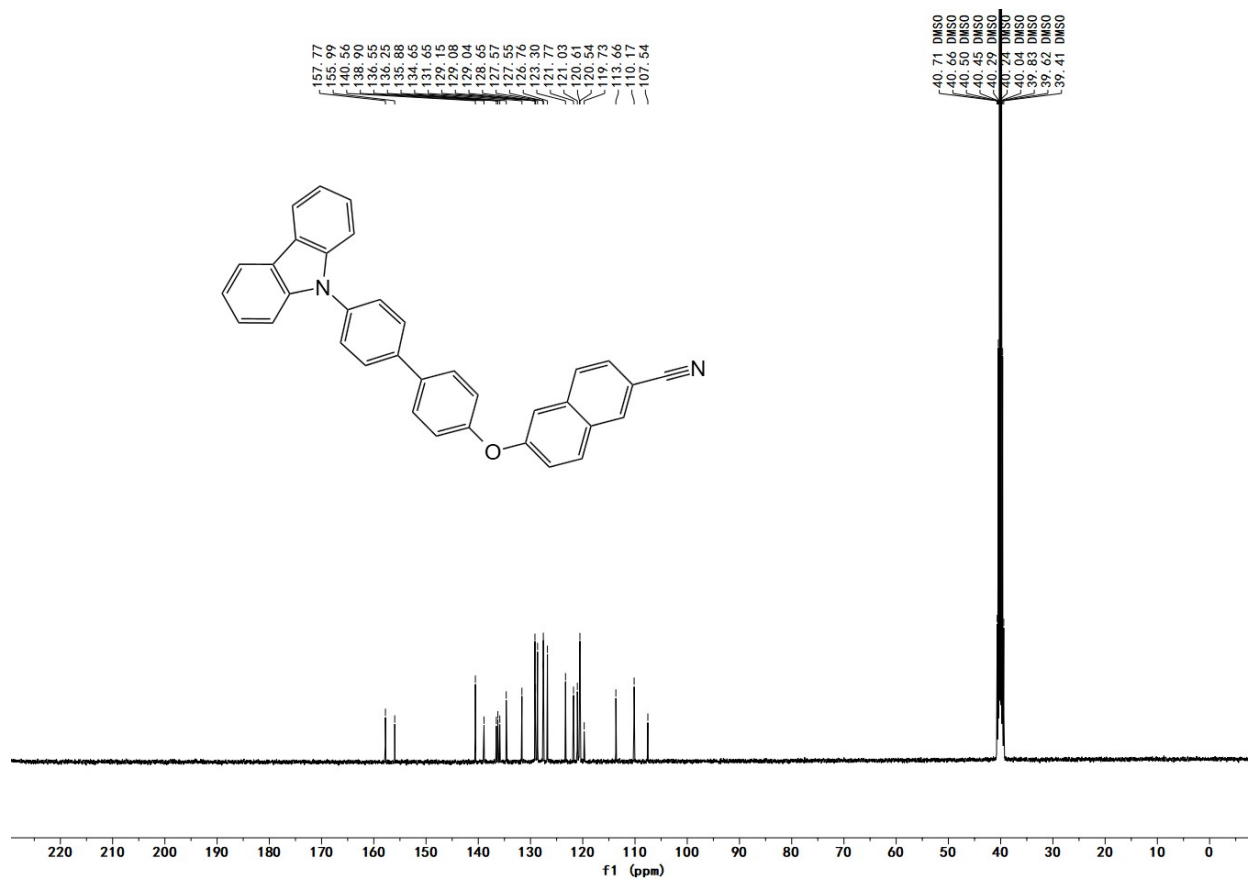

**Fig S24.** <sup>13</sup>C NMR spectrum (101 MHz, DMSO-d<sub>6</sub>) of CzBI-ONAN.

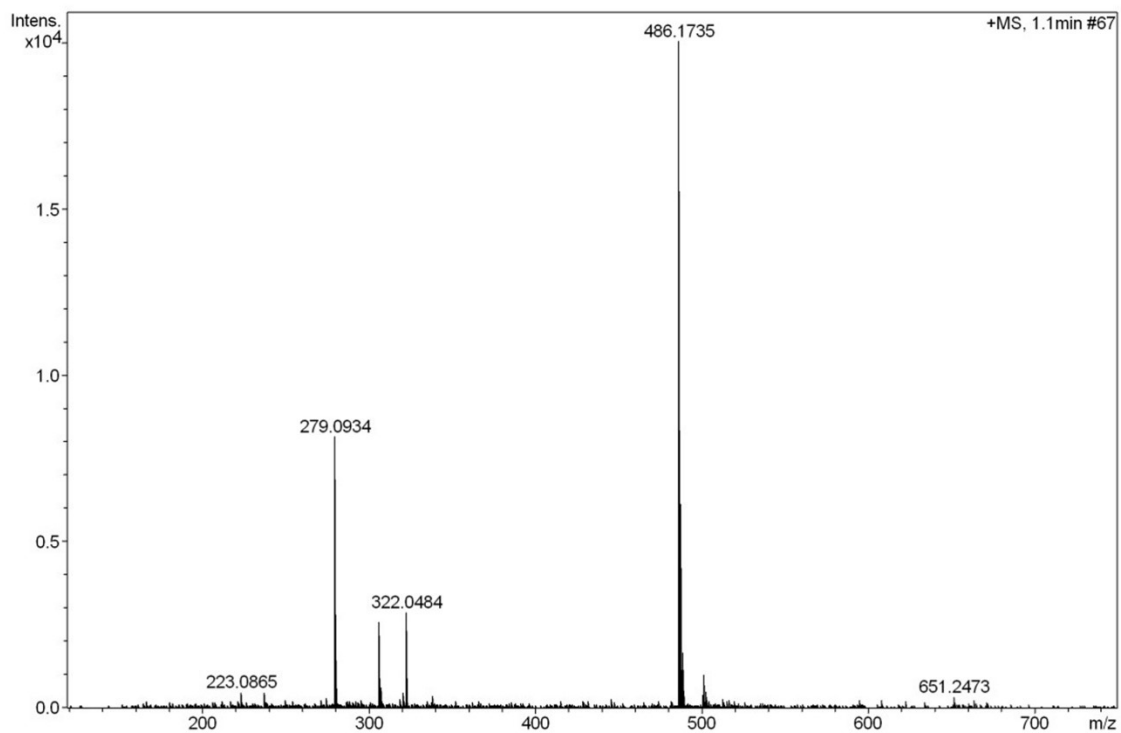

**Fig S25.** HRMS spectrum of **CzBI-ONAN**.

## Reference

1. L.-C. Campeau, M. Parisien, A. Jean and K. Fagnou, *Journal of the American Chemical Society*, 2006, 128, 581-590.
2. A. T. Muhammed Munthasir, R. P. Nandi, P. Dhanalakshmi, S. Pradhan, A. Sirohiwal and P. Thilagar, *The Journal of Physical Chemistry C*, 2025, 129, 10664-10675.
3. X. Zhang, X. Li, Z. Wang, L. Bai, H. Qu and S. Xu, *Chemical Research in Chinese Universities*, 2023, 39, 960-967.
4. Y. Sun, H. Qu, J. Zhang, X. Duan and X. Zhang, *Tetrahedron*, 2022, 110.
5. L. Huang, J. Liu, L. Liu, Q. Yang, Z. Ma and X. Jia, *Dyes and Pigments*, 2020, 173.
6. Y. Wen, S. Xiao, H. Liu, X. Tian, J. De, T. Lu, Z. Yang, D. Zou, Y. Lv, S.-T. Zhang, Q. Su and B. Yang, *Journal of Materials Chemistry C*, 2021, 9, 17511-17517.
